# Approaches for integrating heterogeneous RNA-seq data reveals cross-talk between microbes and genes in asthmatic patients

Daniel Spakowicz<sup>\*1,2,3,4</sup>, Shaoke Lou<sup>\*1</sup>, Brian Barron<sup>1</sup>, Tianxiao Li<sup>1</sup>, Jose L Gomez<sup>5</sup>, Qing Liu<sup>5</sup>, Nicole Grant<sup>5</sup>, Xiting Yan<sup>5</sup>, George Weinstock<sup>2</sup>, Geoffrey L Chupp<sup>5</sup>, Mark Gerstein<sup>1,6,7,8</sup>

<sup>1</sup> Program in Computational Biology and Bioinformatics, Yale University, New Haven, CT

<sup>2</sup> The Jackson Laboratory for Genomic Medicine, Farmington, CT

<sup>3</sup> Division of Medical Oncology, Ohio State University College of Medicine, Columbus, OH

<sup>4</sup> Department of Biomedical Informatics, Ohio State University College of Medicine, Columbus, OH

<sup>5</sup> Section of Pulmonary, Critical Care, and Sleep Medicine, Department of Internal Medicine, Yale University School of Medicine, New Haven, CT

<sup>6</sup> Department of Molecular Biophysics and Biochemistry, Yale University, New Haven, CT

<sup>7</sup> Department of Computer Science, Yale University, New Haven, CT

<sup>8</sup> Department of Statistics and Data Science, Yale University, New Haven, CT

\* These authors contributed equally

## ABSTRACT (337 words)

Sputum induction is a non-invasive method to evaluate the airway environment, particularly for asthma. RNA sequencing (RNAseq) can be used on sputum, but it can be challenging to interpret because sputum contains a complex and heterogeneous mixture of human cells and exogenous (microbial) material. In this study, we developed a methodology that integrates dimensionality reduction and statistical modeling to grapple with the heterogeneity. We use this to relate bulk RNAseq data from 115 asthmatic patients with clinical information, microscope images, and single-cell profiles. First, we mapped sputum RNAseq to human and exogenous sources. Next, we decomposed the human reads into cell-expression signatures and fractions of these in each sample; we validated the decomposition using targeted single-cell RNAseq and microscopy. We observed enrichment of immune-system cells (neutrophils, eosinophils, and mast cells) in severe asthmatics. Second, we inferred microbial abundances from the exogenous reads and then associated these with clinical variables - e.g., *Haemophilus* was associated with increased white blood cell count and *Candida*, with worse lung function. Third, we applied a generative model, Latent Dirichlet allocation (LDA), to identify patterns of gene expression and microbial abundances and relate them to clinical data. Based on this, we developed a method called LDA-link that connects microbes to genes using reduced-dimensionality LDA topics. We found a number of known connections, e.g. between *Haemophilus* and the gene IL1B, which is highly expressed by mast cells. In addition, we identified novel connections, including *Candida* and the calcium-signaling gene CACNA1E, which is highly expressed by eosinophils. These results speak to the mechanism by which gene-microbe interactions contribute to asthma and define a strategy for making inferences in heterogeneous and noisy RNAseq datasets.

## INTRODUCTION

### Linking high-dimensional, heterogeneous datasets

RNA sequencing (RNAseq) has become a standard method of analyzing complex communities. Depending on the sample type, these data can be very heterogeneous. A key problem tackled in this paper is dealing with the heterogeneity and noise in RNAseq data in complex samples such as sputum. This can be appreciated by

43 comparing sputum RNAseq to a more traditional experiment, e.g. blood RNAseq, where the sample can be  
44 collected consistently and that contains relatively well-defined cell types (Figure 1). In blood, the vast majority  
45 of RNAseq reads align to the human genome, and the goal is often to relate the expression of the genes to a  
46 phenotype. By contrast, sputum may be less consistently collected, its cell types are less defined, and it may  
47 contain RNA from microbes and other organisms that act as cryptic indicators of the environment. This  
48 combination of variables and dimensions often requires researchers to collapse the dimensions to  
49 appropriately de-noise the analysis. Here, we present such a strategy that uses a number of supervised and  
50 unsupervised techniques such as single-cell signatures and latent Dirichlet allocation (LDA). These techniques  
51 can produce a low-dimensional representation of common groups of genes, microbes, or other features that  
52 tend to increase or decrease in abundance together. Our approach is useful when the heterogeneity comes  
53 from the sample type (e.g., sputum) and especially when the samples derive from a heterogeneous population  
54 of individuals, such as patients with asthma.

## 55 **Interactions between the host and microbes in the lung**

56 Asthma is a disease of the airway that can present with many clinical phenotypes. Much work has focused on  
57 identifying subgroups of the disease and how each subgroup responds to treatment. For example, Yan et al.  
58 introduced transcriptional endotypes of asthma and the Severe Asthma Respiratory Phenotype consortium  
59 defined five subtypes of asthma [1]. Some of these subgroups respond differently to environmental and  
60 microbial triggers, such as fungal spores. Some fungi have well-defined effects in asthma, but the role of many  
61 microbes remains contentious. A simplified model assigns microbes to one of three categories: pathogenic  
62 organisms that cause inflammation, beneficial organisms that reduce inflammation, and those that have no  
63 effect on inflammation. The majority of the organisms in the lungs are expected to have no effect, and severe  
64 asthmatics are expected to have more pathogenic and fewer beneficial microbes.

## 65 **Inferring immune cell fractions from RNAseq data**

66 The pathology of microbes is often inferred by the number and type of immune cells observed in samples, such  
67 as sputum total leukocyte counts [2, 3]. A standard method for counting immune cells in sputum samples uses  
68 microscopy, but the resolution is limited to a few cell types [4]. Other cell-counting methods such as flow-  
69 sorting can be challenging because of the viscosity and highly variable cell numbers in sputum. An alternative  
70 strategy uses cell-type specific expression patterns to deconvolve RNAseq reads from mixtures of cells into  
71 fractions of different immune cells [5]. This deconvolution also effectively de-noises heterogeneous datasets by  
72 greatly reducing the number of dimensions. Importantly, the RNA needed for this analysis can be purified  
73 without poly-A enrichment— here, we use human ribosomal RNA knockdown – which allows for the  
74 simultaneous analysis of microbial and human transcripts.

## 75 **Supervised deconvolution and the microbiome**

76 While deconvolution to cell fractions effectively de-noises human RNAseq data, an equivalent method does not  
77 exist for microbes. Although we can map microbe reads onto their genomes, this approach is imperfect  
78 because the genome databases are incomplete and assigning a read to a single genome can be complicated if  
79 it matches more than one equally well. One can reduce the dimensions by collapsing microbial strains to  
80 different taxonomic ranks (e.g., genus or family); however, taxonomy is notoriously imprecise at defining  
81 behavior. For example, many bacteria in the genus *Escherichia* are human commensals, whereas *Escherichia*  
82 *coli* OH157:H7 causes hemorrhagic colitis. Alternatively, one can group sequences by the metabolic pathways  
83 observed, although this requires high-depth sequencing. Here, we propose a method to reduce the

84 dimensionality of microbes by first linking the microbes to human genes, and then applying the relatively well-  
85 defined gene dimensionality-reduction methods (e.g., deconvolution to cell types).  
86

87 In this paper, we use RNAseq of sputum samples from asthmatic patients to demonstrate dimensionality-  
88 reduction strategies and identify microbe-host relationships. We map RNAseq reads onto human or microbial  
89 genomes and relate the resulting abundance matrices to each other and to clinical data. Further, we  
90 deconvolve the human reads into fractions of the various cell types that make up sputum. Finally, we relate the  
91 human genes and microbes using a method we call LDA-link, which identifies relationships between genes,  
92 microbes, and cell types. These methods represent a general strategy for dealing with heterogeneous RNAseq  
93 data that is applicable to other sample types beyond sputum.  
94

## 95 RESULTS

### 96 Sequencing and processing with the extracellular RNA processing toolkit (exceRpt) pipeline

97 We collected induced sputum samples from 115 patients with heterogeneous asthma phenotypes and  
98 sequenced these sample using RNAseq. The median read depth per sample was 47.5 million, which meets  
99 depth recommendations for analyses of this type [6]. We processed these reads through the exceRpt pipeline  
100 [7], which conservatively matches reads to genomes in a sequential order designed to reduce experimental  
101 artifacts. In brief, we first aligned the quality filtered reads to the UniVec database of common laboratory  
102 contaminants<sup>2</sup>, and then aligned the remaining reads to human ribosomal sequences before aligning them to  
103 the human genome. We excluded samples with a low ratio of transcript alignments to intergenic sequence  
104 alignments, and then aligned the remaining reads to the comparably large sequence space of non-human  
105 genomes. We first aligned reads to the relatively well-curated ribosomal databases of bacteria, fungi, and  
106 archaea (e.g., Ribosomal Database Project<sup>3</sup>) and then to curated genomes of bacteria, fungi, viruses, plants,  
107 and animals. The percent of reads mapping to different biotypes was highly heterogeneous; a median of 60%  
108 of the reads aligned to the human reference genome and 50% to annotated transcripts (Figure 1, green bars).  
109 A median of 0.7% of the input reads aligned to exogenous sources, with some samples containing as much as  
110 28.1% exogenous reads. As a control, we applied the same protocol to blood samples, which demonstrated  
111 more homogeneity than sputum (Figure 1, top, “blood”).

### 112 Overview of the analysis approach

113 The goal of the analysis was to infer meaningful relationships between the numbers and origins of the RNAseq  
114 reads and relate them to clinical phenotypes. We conceptualized the clinical information and RNAseq  
115 alignments as a series of tables (**Figure 1**). The clinical table includes patient data collected at the clinic, **C**,  
116 including age, weight, lung function tests, etc, with rows indexed by patient ( $p$ ) and roughly 200 clinical  
117 variables ( $N_c$ ). Alignments to human protein-coding regions created the gene table, **G**, with  $N_p$  rows, as above,  
118 and roughly 20,000 genes ( $N_g$ ). Alignments to exogenous genomes created the microbe table (**M**) with  $N_p$   
119 rows and roughly 1,000 microbes ( $N_m$ ). Given these three tables (**C**, **G**, and **M**), the basic analysis framework  
120 is to correlate columns or rows within or between tables. We represent this by a matrix of correlations,  $\mathbf{R}(X_{\cdot,i},$   
121  $Y_{\cdot,j})$ , where  $X_{\cdot,i}$  is the  $i^{\text{th}}$  column of table **X** and  $Y_{\cdot,j}$  is the  $j^{\text{th}}$  column of table **Y**. This correlation is summed over  
122 the other index, usually  $p$ . For example, we test the relationship between age and the abundance of each  
123 microbe  $\mathbf{R}(C_{\cdot,age}, M_{\cdot,m})$  across all patients. Similarly, we correlate the expression of a gene (e.g., *TLR4*) with  
124 microbe *Candida*  $\mathbf{R}(G_{\cdot,TLR4}, M_{\cdot,Candida})$ .  
125

126 Individual correlations can be difficult to interpret, particularly in heterogeneous, sparse, or noisy datasets.  
127 Organizing the genes into relevant pathways or cell types can reduce the dimensionality and de-noise the  
128 analysis. To this end, we deconvolved  $\mathbf{G} (N_p \times N_g)$  into a cell-type fraction table,  $\mathbf{F} (N_p \times N_f)$ , and a cell-type  
129 signatures table,  $\mathbf{S} (N_f \times N_g)$ . However, an analogous supervised method does not exist for the microbes.  
130 Therefore, we applied an unsupervised dimensionality-reduction approach, latent dirichlet allocation (LDA),  
131 which provides a topic distributions in patients ( $\theta^G, N_p \times N_k$ ) across a smaller number ( $N_k=10$ ) of topics and  
132 gene topic (and  $\varphi^G, N_k \times N_g$ ). This can also be done to the microbe table  $\mathbf{M}$  and get  $\theta^M$  and  $\varphi^M$ , and the gene  
133 and microbe topic can be correlated (e.g.  $\mathbf{R}(\theta^G, \theta^M)$  over all patients).

134  
135 The framework described above is useful for identifying linear relationships, but non-linear relationships are  
136 also possible. For example, a microbe sensed by a human immune cell could lead to the activation of a  
137 transcription factor and the expression of several genes, each of which would have a non-linear relationship to  
138 microbe abundance. To identify such relationships, we applied a non-linear ensemble learning algorithm [8, 9],  
139 using the de-noised inputs for each gene and microbe ( $\varphi^G$  and  $\varphi^M$ ). We call this method LDA-link. Further, we  
140 relate the gene and microbe links identified to cell fractions and thereby relate how the host is responding to  
141 microbes with regards to immune cell type response with a particular gene.

## 142 Analysis of human-aligned reads

143 Working toward the hypothesis that we can conceptualize human-aligned sputum RNAseq reads as a mixture  
144 of immune cell types, each with a distinct expression profile, we deconvolved the Gene table ( $\mathbf{G}$ ) into a table of  
145 fractions of component cells type ( $\mathbf{F}$ ) and cognate cell-type signatures ( $\mathbf{S}$ ) by solving the formula  $\mathbf{G} \sim \mathbf{F} * \mathbf{S}$ .  
146 This method relies on knowing the signature gene-set in each cell type, which derived from the blood immune  
147 cell high quality profiles. To validate that we could apply these cell expression profiles to sputum, we generated  
148 several additional datasets including single-cell RNAseq (scRNAseq), microscopy, and unsupervised  
149 decomposition, and then compared the results to the deconvolution table  $\mathbf{F}$ . (Figure 2A, schema).

## 150 Evaluation of deconvolution results by scRNAseq

151 First, we performed scRNAseq on a cohort of similar sputum samples (five control and five asthmatic patients).  
152 The single-cell sequences clustered into four groups (Figure 2B, first and second panels). To determine  
153 whether the reference profiles that we used to deconvolve the bulk RNAseq recapitulate those found in the  
154 single-cell clusters, we co-clustered the reference profiles with the scRNAseq data (Figure 2B, third panel).  
155 The reference profiles split into the groups by lineage; for example, those in the lymphoid progenitor line co-  
156 clustered with cluster 2, and the myeloblast progenitor line co-clustered with cluster 4. This result suggests that  
157 the reference profiles accurately represent the cell types in sputum. The myeloid lineage cluster showed a  
158 significant difference in the number of cells between asthmatics and controls (Figure 2C). From this analysis,  
159 we concluded that (1) the blood-derived cell profiles appropriately fit the sputum cell types and (2) no additional  
160 cell types are needed to deconvolve the sputum bulk RNAseq data.

## 161 Evaluation of deconvolution results by microscopy

162 Second, we evaluated a subset of the samples by microscopy and manually counted the number of  
163 neutrophils, eosinophils, lymphocytes, and macrophages. We found good agreement with  $\mathbf{F}$ , when cell counts  
164 could be directly compared, i.e. neutrophils and eosinophils were both present in  $\mathbf{F}$  and counted by  
165 microscopy. In cases where the deconvolution method gave higher resolution, (e.g., M0, M1, and M2

166 macrophages versus one type of macrophage by microscopy), the aggregation of the relevant columns in  $F_f$   
167 correlated well with the microscopy counts (Figure 2D).  
168

## 169 Association of cell fractions with clinical features

170 Having validated the deconvolution of sputum samples (table  $F$ ), we then correlated the cell fractions with  
171 clinical features ( $R(F_{,f}, C_{,c})$  for all patients). We found that the changes in fractions of several cell types were  
172 highly correlated with clinical features (Figure 2E). For example, the fraction of T-regulatory cells negatively  
173 correlated with the number of hospitalizations per year, suggesting a beneficial role of these cells in the  
174 management of asthma.  
175

## 176 Evaluation of deconvolution results by unsupervised decomposition

177 We compared the signal captured by cell-type deconvolution to an unsupervised decomposition method: LDA.  
178 Using LDA, we factored the gene expression table into ten topics that conceptually represent gene expression  
179 programs. This resulted in a gene-topic-fraction-in-patients table,  $\theta^G (N_p \times N_k)$  with  $N_k=10$  topics, as well as  
180 corresponding gene-topic table,  $\varphi^G (N_k \times N_g)$ , that are analogous to the supervised deconvolution tables  $F$  and  
181  $S$ . We correlated the cell-type fractions table with the gene topics fraction table ( $R(F_{,f}, \theta_{,k})$  for all patients, and  
182 found agreement between LDA and the cell-signature-based deconvolution for only the most prominent cell  
183 type, neutrophils (Figure 2D, topic 4). The top genes associated with topic 4 were enriched in the neutrophil  
184 chemotaxis pathway (Figure S8 B).  
185

186 However, the remaining topics were comprised of multiple cell types. This suggests that LDA can identify  
187 distinct but partially overlapping features in  $G$ . According to the clustering of  $\theta^G$ , a subgroup of severely  
188 asthmatic patients was highly correlated with topic four (**Figure S8A**). The top-weighted genes in topic 4 were  
189 enriched for the pathways “neutrophil chemotaxis” and “asthma-related genes” (**Figure S8B**). These pathways  
190 were not enriched in the analogous cell-type-signatures table  $S$ , suggesting that LDA topics are distinct from  
191 the cell-type signatures, but are also clinically relevant. Moreover, the top-weighted genes in topic 1 of the  
192 gene topic components table were mitochondrial genes, and topic 1 was strongly correlated with age. This link  
193 shows strong support in the literature, as reactive oxygen species produced by the mitochondria reduce their  
194 function over time [10]; however, we did not observe this relationship for any cells in the cell-type-fractions  
195 table ( $F$ ). Another method using a very different algorithm than LDA, non-negative matrix factorization (NMF),  
196 showed strong agreement with LDA (Figure S2, Nmf.1). This supports the use of supervised deconvolution  
197 methods as picking out interpretable signals that are different than those identified by unsupervised methods.  
198 Unsupervised decomposition should be considered a set of features distinct from those found through  
199 deconvolution.  
200

## 201 Analysis of exogenous reads

202 After filtering out contaminants and human reads, we assembled the set of reads that aligned to exogenous  
203 genomes into a Microbe table ( $M$ ). The exogenous sequences aligned to mostly bacteria and fungi, although  
204 we also observed a few arthropod and helminth reads (**Supplemental Table X**). The dominant phyla observed  
205 were from the bacterial kingdom: Proteobacteria, Firmicutes, and then Bacteroidetes. The abundance of  
206 Proteobacteria is in contrast to observations from the gut where Bacteroidetes predominate [11]. Also notable



was the presence of two phyla of fungi among the eight most abundant overall, although this was in lower abundance than many of the bacterial phyla.

### Microbes correlations with clinical information and cell fractions

We correlated the microbe abundances to clinical information ( $R(M_{.m}, C_{.c})$  for all patients) (**Figure 3A**). *Haemophilus* was associated with increased total white blood cell numbers, as has been described previously [12]. *Candida* was associated with worse lung function test results (e.g., forced expiratory volume and forced vital capacity), which supports the association with a severe form of asthma characterized by eosinophilia [13].

We next correlated microbe abundances to human immune cell fractions ( $R(M_{.m}, F_{.f})$  for all patients) (**Figure 3B**). Several correlations demonstrated results with strong literature precedence. For example, studies have previously shown that *Haemophilus* associates with eosinophilia [14], and we observed a significant correlation between *Haemophilus* and the fraction of eosinophils. We also observed a significant correlation between *Haemophilus* and activated mast cells, suggesting an alternative route to *Haemophilus*-induced inflammation [15]. Moreover, the fungal genus *Candida* was also significantly correlated with eosinophils, even more strongly than *Haemophilus*. Pulmonary candidiasis has long been associated with allergic bronchial asthma and inflammation [16], however few lung microbiome studies have examined both bacterial and fungal signals. This highlights the need for a more comprehensive search of the lung microbiome and demonstrates the power of an RNAseq-based method that can report on all kingdoms with the same sample preparation.

### Dimensionality reduction for microbes: clustering and networks

We attempted to de-noise the microbe table ( $M^{phylum}$ ) with a variety of dimensionality-reduction techniques. First, we collapsed the microbes by taxonomy, grouping them to the rank of phylum, and then hierarchically cluster the patients based on their phylum abundance (Figure 3C **HierClust**( $M^{phylum}$ )). The hierarchical clustering showed that the phylum distributions formed three clusters of patients. We related these clusters to the clinical variable “asthma severity” and observed that cluster 2 was enriched for patients identified as having moderate or severe asthma. This cluster was characterized by the highest relative abundance of the phylum Proteobacteria (Figure 3C). Notably, the genus *Haemophilus* belongs to this phylum, consistent with the correlations observed at the genus rank (Figures 3A, 3B).

Similarly, we could de-noise the microbe table using a co-abundance network, by correlating the genus-level abundances ( $R(M_{.m}, M_{.m})$ ) and identifying significant modules (**Supplemental Figure Z**). An interpretation of these modules is that they define metabolic niches, where microbes either directly compete for metabolites or there is interdependency in metabolite production. Such networks could be created from other tables, such as the topic distribution of microbes ( $R(\varphi_{.m}^M, \varphi_{.m}^M)$  for all the topics) (**Figure 3D**). These modules represent another unit that could be related to the clinical information (**C**) and the cell-type fractions (**F**).

### LDA-link for the identification of links between genes and microbes

How much cross-talk exists between microbes and human cells in the airway remains contentious [17]. We feel this is partly due to the heterogeneous and noisy data from airway samples, where it is often difficult to find strong correlations using standard algorithms. We therefore sought to link genes to microbes via a new method called LDA-link.

LDA-link connects genes to microbes using a combination of linear correlation, unsupervised decomposition and an ensemble learning classifier. We hypothesized that the only strongest gene and microbe correlations

would be observable through the noise in the RNAseq data. Therefore, we used these strong links as a training set to find other links, after taking steps to reduce the noise in the data. We reduced the noise using LDA and then identified links using a random forest classifier, described in more detail below and in the methods section.

To define the training, set we first related columns between the gene and microbe tables ( $\mathbf{R}(G_g, M_m)$ ), yielding many low-scoring correlations. However, a relatively small number were strong ( $\mathbf{R} > 0.4$ ) and highly significant ( $p < 1E-5$  after FDR correction) (**Figure 4A**). We selected the very strong correlations as true-positive links between genes and microbes in the training set, and non-correlated pairs ( $-0.05 < \mathbf{R} < 0.05$ ) as true-negative links. The genes involved in these strong correlations were enriched for pathways related to microbial interactions in the airway, including “Asthma & Bronchial Hypersensitivity” and “Respiratory Syncytial Virus Bronchiolitis” (**Figure 4B**), suggesting that the small set of strong linear correlations were relevant to asthma.

Next, we trained a random forest classifier on the linear correlations described above. To reduce the noise in the data, the features used as inputs to the classifier were the LDA topics for each gene and microbe ( $\varphi_{g,m}^G, \varphi_{g,m}^M$ ). That is, for each gene-microbe pair, we concatenated the gene and microbe topics into a single vector (length 20). The Gini index showed the most important features in defining links between genes and microbes were gene topics #7 and #8, and microbe topic #1 (**Figure 4 C-F**). The genes that comprise the most influential gene topic #8, are enriched for the pathway “Inflammatory Response”, and specifically the cytokines IL2 and IL6. It is tempting to speculate that these genes are strong predictors of a link between genes and microbes because they indicate when the presence of a microbe has triggered an inflammatory response.

### Cross-talk between genes and microbes defined by LDA-link

LDA-link identified connections between genes and microbes reported elsewhere in the literature as well as novel observations. A bipartite graph summarizes a subset of the connections, showing in most cases several genes linked to each microbe (**Figure 5A**, for a complete list see **Supplemental Table X**). Notably, both fungi and bacteria showed these links, further highlighting the need to evaluate more than bacteria when performing microbiome experiments in the airway. The gene lactotransferrin was linked to *Aeromonas*, which has been associated with gastroenteritis and skin infections and has been previously reported to bind lactoferrin [18]. *Burkholderia*, a gram-negative bacterial genus, is recognized as an important pathogen in the mucus-filled lungs of patients with cystic fibrosis; it was linked to gene MUC6, which encodes a secreted protein responsible for the production of mucin [19]. *Haemophilus* was observed to be linked to NFKB Inhibitor Zeta, which is induced by the bacterial cell wall component lipopolysaccharide [20]. In addition, *Haemophilus* was linked to the cytokine interleukin 1 beta (IL1B), an important mediator of the inflammatory response. IL1B hypersensitivity is a hallmark of the asthma phenotype. *Pasteurella* was also linked to IL1B, and its toxin has been shown to induce expression of IL1B [21]. In addition to single gene-microbe pairs, we layered on pathway and cell deconvolution data to identify larger-scale effects of microbes.

Microbes were linked to genes that are enriched in pathways relating to auto-immunity and inflammation as well as cytokine receptors and their interactions (**Figure 5B**). The microbes associated with cytokine pathways included *Synechococcus*, *Lactococcus*, *Dialister*, *Psychrobacter*, *Moraxella*, *Brenneria*, *Proteus*, *Haemophilus*, and *Pasteurella*. In addition, we related the cell-type signatures table ( $\mathbf{S}_{i,g}$ ) to identify the immune cell types that are related to each microbe (**Figure 5C**). We observed the *Haemophilus*-IL1B linkage in monocytes and mast cells. Samples containing *Haemophilus* triggered more activated mast cells according to its cell fraction (**Figure 5C inset**) [22-25]. Similarly, the fungal genus *Candida* was linked to the gene GCSAML, which was

294 highly expressed by eosinophils. The presence of *Candida* was associated with increased numbers of  
295 Eosinophils in the airway.  
296

## 297 DISCUSSION

298 Heterogeneity and noise are common problems in biological datasets. Heterogeneity can derive from mixtures  
299 of different cell types, such as in sputum, or from sparsity, such as in microbiome or single-cell RNAseq data.  
300 Unsupervised methods of dimensionality reduction can effectively eliminate these issues, but suffer from  
301 decreased interpretability. That is, variables are collapsed together for reasons that are often opaque.  
302 Supervised dimensionality reduction maintains interpretability because variables are collapsed using prior  
303 knowledge, such as the genes in a pathway or the expression patterns of a cell type. Here, we combined  
304 unsupervised and supervised approaches to de-noise the data while retaining interpretability.  
305

306 The field is increasingly appreciating the role of the airway microbiome in the development of disease.  
307 Commensal microbiota have been shown in other contexts to be strong regulators of host immune system  
308 development and homeostasis [26]. Disturbances in the composition of commensal bacteria can result in  
309 imbalanced immune responses and affect an individual's susceptibility to various diseases, including those that  
310 are inflammatory (e.g., inflammatory bowel disease and colon cancer), autoimmune (e.g., celiac disease and  
311 arthritis), allergic (e.g., asthma and atopy), and metabolic (e.g., diabetes, obesity, and metabolic syndrome)  
312 (reviewed in [27]). Investigating the microbiota in the lower respiratory tract is a relatively new field in  
313 comparison to the extensive work on the intestinal tract. In fact, the lung was excluded from the original Human  
314 Microbiome Project because it was not thought to have a stable resident microbiome [11]. A limited number of  
315 reports have investigated the changes in the lung microbiota between healthy, non-smoking and smoking  
316 individuals as well as in patients suffering from cystic fibrosis, chronic obstructive pulmonary disease, or  
317 asthma [2, 28-30]. Despite emerging data on the airway microbiota, little is known about the role of the lung  
318 microbiome in modulating pulmonary mucosal immune responses. LDA-link can find relationships between  
319 microbes and genes and link them to immune cells and their responses.  
320

321 The linkages identified here suggest major processes by which lung immune cells respond to microbes. We  
322 found that mast cells respond to *Haemophilus* and *Pasteurella* via IL1B and that eosinophils respond to  
323 *Candida* via GCSAML. While experimental validation of these linkages is needed, these results represent  
324 observations that would be missed by analyses that do not deconvolve RNAseq data into cell fractions, or that  
325 analyze only human RNAseq reads. We expect LDA-link to be broadly useful in relating heterogeneous or  
326 noisy RNAseq data.

## 327 METHODS

### 328 Sample collection and sequencing

329 Sputum induction was performed with hypertonic saline, the mucus plugs were dissected away from the saliva,  
330 the cellular fraction was separated, and the RNA was purified as described previously [1]. Briefly, RNA was  
331 purified using the All-in-One purification kit (Norgen Biotek) and its integrity was assayed by an Agilent  
332 bioanalyzer (Agilent Technologies, Santa Clara, CA). Ribosomal depletion was performed with the RiboGone-  
333 Mammalian kit (Clontech Cat. Nos. 634846 & 634847 ) and cDNA was created with the SMARTer Stranded  
334 RNAseq Kit (Cat. Nos. 634836). Samples were sequenced using an Illumina HiSeq 4000 with 2x125 bp reads,  
335 with an average of 47.5 million reads per sample.



## 336 RNAseq processing by exceRpt

337 An adapted version of the software package exceRpt [7] was used to process the sputum RNAseq data.  
338 Briefly, RNAseq reads were subjected to quality assessment using FastQC software v.0.10.1  
339 (<https://www.bioinformatics.babraham.ac.uk/projects/fastqc/>) both prior to and following 3' adapter clipping.  
340 Adapters were removed using FastX v.0.0.13 ([http://hannonlab.cshl.edu/fastx\\_toolkit/](http://hannonlab.cshl.edu/fastx_toolkit/)). Identical reads were  
341 counted and collapsed to a single entry and reads containing N's were removed. Clipped, collapsed reads  
342 were mapped directly to the human reference genome (hg19) and pre-miRNA sequences using STAR [31].  
343 Reads that did not align were mapped against a ribosomal reference library of bacteria, fungi, and archaea,  
344 compiled by the Ribosome Database Project [32], and then to genomes of bacteria, fungi, plants, and viruses,  
345 retrieved from GenBank [32]. In cases where RNAseq reads aligned equally well to more than one microbe, a  
346 "last common ancestor" approach was used, and the read was assigned to the next node up the phylogenetic  
347 tree, as performed by similar algorithms [7, 33].  
348

## 349 Data tables notation

350 We use the following notation to define matrices associated with  $p$  patients (115) (Figure 1):

351 **C**: Clinical table ( $N_p \times N_c$ ),  $c$  is the clinical index

352 **G**: Gene table ( $N_p \times N_g$ ), bulk-RNA seq table before deconvolution,

353 **M**: Microbe abundance table ( $N_p \times N_c$ )

354 **F**: Cell fractions table ( $N_p \times N_f$ ), resulting from the deconvolution of  $\mathbf{G}_{p,g}$

355 **S**: Cell signatures table ( $N_f \times N_g$ ), resulting from the deconvolution of  $\mathbf{G}_{p,g}$

356  $\theta^G$ : Patient topic table ( $N_p \times N_k$ ) after LDA inference based on gene table  $\mathbf{G}_{p,g}$

357  $\varphi^G$ : Gene topic table ( $N_k \times N_g$ ) after LDA inference based on gene table  $\mathbf{G}_{p,g}$

358  $\theta^M$ : Patient topic table ( $N_p \times N_k$ ) after LDA inference based on microbe table  $\mathbf{M}_{p,m}$

359  $\varphi^M$ : Microbe topic table ( $N_k \times N_m$ ) after LDA inference based on table  $\mathbf{M}_{p,m}$

360 **L**: gene microbe linkage table ( $N_g \times N_m$ ) predicted by LDA-link  
361

## 362 Dimensionality Reduction

### 363 Supervised, deconvolution

364 The gene table (**G**) was deconvolved using the transcriptomes from 22 flow cytometry-sorted and sequenced  
365 immune cell types (Im22) using the CIBERSORT tool [5]. Briefly, a pre-defined set of characteristic gene  
366 expression patterns for each cell type was used to identify the fraction of each cell type given a mixture of  
367 expression by solving for the equation:

$$\mathbf{G} = \mathbf{F} * \mathbf{E}$$

370  
371 Where **G** is the Gene table of human protein-coding gene expression from the exceRpt pipeline, **F** is the Cell  
372 Fraction table, and **E** is the characteristic gene expression calculated within CIBERSORT. Support Vector  
373 Regression was used to perform variable selection, reducing the number of characteristic genes used to  
374 distinguish cell types and thereby reducing overfitting. The above equation was then solved to provide an  
375 estimate of **F**. P-values for the fit of **E** and **F** to **G** demonstrated that all samples were significant at  $\alpha = 0.05$ .

Following the solution of **F**, a Cell Signature table **S** was calculated to estimate the expression of  $g$  genes, as opposed to the reduced set appropriate for the characteristic expression evaluation, by solving the equation:

$$\mathbf{S} = \mathbf{G} * \mathbf{F}$$

### Decomposition through a generative model

The Gene table **G** was decomposed using LDA and Non-negative Matrix Factorization (NMF).

For LDA, the abundance values for bulk RNAseq and exogenous RNA were scaled down to reduce computation intensity during sampling. More simply, the RPM expression values were converted to integers, and then divided by 10. The max value was set to 1,000.

Given each patient ( $p$ ), all of the genes and microbes were treated like corpus of words in the traditional LDA application. The word ( $w$ ) was gene or microbe, and the word count was gene expression or microbe abundances. We built LDA models for genes and microbes, respectively.

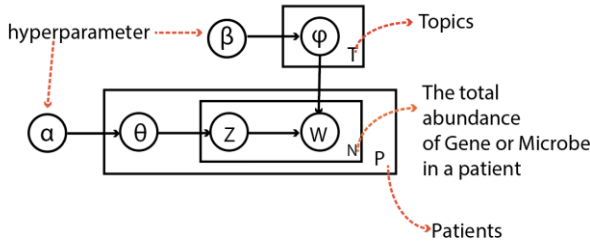

$$\begin{aligned} \varphi_k &\sim \text{Dirichlet}(\beta) \\ \theta_p &\sim \text{Dirichlet}(\alpha) \\ Z_{p,n} &\sim \text{Multinomial}(\theta_p) \\ w_{p,n} &\sim \text{Multinomial}(\varphi_{z_{p,n}}) \end{aligned}$$

Given  $p, w, k, v, N_p, N_w, N_k, N_v, \alpha, \beta, Z, \theta, \varphi, W$ , where  $p, w, k, v$  denote a patient, a word in a document, a topic and a word in the corpus respectively;  $N_p$  is the number of documents(patients),  $N_w$  is the number of words (gene or microbe) in a document,  $N_k$  is the number of topics (set as 10),  $N_v$  is the corpus for all the documents;  $\alpha$  ( $N_k$  dimensional vector) and  $\beta$  ( $N_v$ -dimensional vector) are the hyper parameters for  $\theta$  ( $N_p \times N_k$ , the distributin of topics in documents) and  $\varphi$  ( $N_k \times N_v$ , the distribution of word for topics)  $W$  is an  $N_w$ -dimensional vector that denotes the word (gene or microbe expression) in a document (patients).  $Z$  is the  $N_w$ -dimensional vector of integers between 1 and  $N_k$  for the topic of word in a document.

The joint distribution of the LDA model is  $\mathcal{P}(Z, W; \alpha, \beta)$  and  $\varphi$  and  $\theta$  are integrated out as:

$$\begin{aligned} \mathcal{P}(Z, W; \alpha, \beta) &= \int_{\varphi} \prod_{i=1}^{N_k} \mathcal{P}(\varphi_i; \beta) \prod_{j=1}^{N_p} \prod_{t=1}^{N_w} \mathcal{P}(W_{j,t} | \varphi_{Z_{j,t}}) d\varphi \int_{\theta} \prod_{i=1}^{N_p} \mathcal{P}(\theta_i; \alpha) \prod_{j=1}^{N_w} \mathcal{P}(Z_{i,j} | \theta_i) d\theta \\ &= \prod_{k=1}^K \frac{\Delta(n_{\cdot,k} + \beta)}{\Delta(\beta)} \prod_{s=1}^S \frac{\Delta(n_{s\cdot} + \alpha)}{\Delta(\alpha)} \end{aligned}$$

Where  $\Delta(\alpha) = \frac{\prod_{k=1}^K \Gamma(\alpha_k)}{\Gamma(\sum_{k=1}^K \alpha_k)}$

Gibbs sampling equation can be derived from  $\mathcal{P}(Z, W; \alpha, \beta)$  to approximate the distribution of  $\mathcal{P}(Z|W; \alpha, \beta)$  because  $\mathcal{P}(W; \alpha, \beta)$  is invariant to  $Z$ . Given  $Z_{m,n}$  denotes the topic of the  $n$ th word token in the  $m$ th document,

and also assume that its word symbol is the  $v$ th word in the vocabulary, the conditional probability can be inferred as follows:

$$\begin{aligned}
 \mathcal{P}(Z_{m,n} = k | Z_{-(m,n)}, W; \alpha, \beta) &= \frac{\mathcal{P}(Z, W; \alpha, \beta)}{\mathcal{P}(Z_{-(m,n)}, W; \alpha, \beta)} = \frac{\mathcal{P}(w, z)}{\mathcal{P}(w_{m,n}, w_{-(m,n)}, z_{-(m,n)})} = \frac{\mathcal{P}(w, z)}{\mathcal{P}(w_{-(m,n)}, z_{-(m,n)})} \cdot \frac{1}{\mathcal{P}(w_{m,n}=t)} \\
 &\propto \frac{\mathcal{P}(w, z)}{\mathcal{P}(w_{-(m,n)}, z_{-(m,n)})} \\
 &= \frac{\prod_{k=1}^K \frac{\Delta(n_{\cdot, k} + \beta)}{\Delta(\beta)} \prod_{p=1}^P \frac{\Delta(n_{p, \cdot} + \alpha)}{\Delta(\alpha)}}{\prod_{k=1}^K \frac{\Delta(n_{-(m,n), k} + \beta)}{\Delta(\beta)} \prod_{p=1}^P \frac{\Delta(n_{p, -(m,n)} + \alpha)}{\Delta(\alpha)}} \\
 &= \frac{\Delta(n_{\cdot, k} + \beta)}{\Delta(n_{-(m,n), k} + \beta)} \cdot \frac{\Delta(n_{p, \cdot} + \alpha)}{\Delta(n_{p, -(m,n)} + \alpha)}
 \end{aligned}$$

After sampling, the expectation of the  $\theta$  (doc  $\rightarrow$  topic) and  $\varphi$  (topic  $\rightarrow$  word) matrix can be inferred as follows given the symmetric hyper-parameters  $\alpha$  and  $\beta$  were used:

$$\begin{aligned}
 \theta_{p,k} &= \frac{n_{p,k} + \alpha}{\sum_{i=1}^K n_{p,i} + N_k \alpha} \\
 \varphi_{k,v} &= \frac{n_{k,v} + \beta}{\sum_{i=1}^V n_{k,i} + N_v \beta}
 \end{aligned}$$

We instantiated the variables  $\theta$  and  $\varphi$  to  $\theta_{p,t}^G, \theta_{p,t}^M$ , and  $\varphi_{k,g}^G, \varphi_{k,m}^M$ , where  $\theta_{p,t}^G, \theta_{p,t}^M$  denotes the gene and microbe topic fraction in patient;  $\varphi_{k,g}^G, \varphi_{k,m}^M$  denotes the gene and microbe topic.

### Single-cell RNAseq

Sputum cells were separated on a Fluidigm C1 medium-sized channel. The mRNA was purified from approximately 500pg-1ng of total RNA using the Clontech SMARTer Ultra Low RNA Kit and poly-dA-selected using SPRI beads and dT primers. Full-length cDNA was sheared into 200-500bp DNA fragments by sonication (Covaris, Massachusetts, USA), and then indexed and size validated by LabChip GX. Two nM libraries were loaded onto Illumina version 3 flow cells and sequenced using 75bp single-end sequencing on an Illumina HiSeq 2000 according to Illumina protocols. Data were cleaned, processed, aligned, and quantified following the SINCERA pipeline [34].

### Pathogen-to-host linkage identification

Microbe relative abundances and gene TPM values were correlated as follows, with  $G_{\cdot, i}$  for  $i$  gene and  $M_{\cdot, j}$  for  $j$  microbe:

$$R(i, j) = \frac{\sum_{p=1}^{N_p} (G_{p,i} - \bar{G}_{\cdot, i})(M_{p,j} - \bar{M}_{\cdot, j})}{\sqrt{\sum_{p=1}^{N_p} (G_{p,i} - \bar{G}_{\cdot, i})^2} \sqrt{\sum_{p=1}^{N_p} (M_{p,j} - \bar{M}_{\cdot, j})^2}}$$

444 Gene-microbe correlations with  $p$ -values less than  $1e-5$  (absolute correlation greater than 0.4) were chosen as  
445 the positive links in a training set. Negative links in the training set were defined as an absolute correlation of  
446 less than 0.05. This approach resulted in 302 positive and 650,398 negative links. A random forest algorithm  
447 was trained on this set, which can accommodate the highly unbalanced dataset as well as potentially identify  
448 non-linear links between genes and microbes. Down-sampling and up-sampling techniques were tested but did  
449 not significantly improve the model. In the final model, we adopted the upscaling technique and tested it using  
450 cross-validation. The positive dataset was upscaled to very high levels. We use 2-fold cross validation to  
451 validate the performance. Simply, we randomly select half training data to train the model, and use the  
452 remaining records to test the performance and repeat this for ten times. The AUC and AUPR were 0.994 and  
453 0.996 on average, respectively.

#### 454 **Microbe co-abundance network**

455 The raw abundance  $M$  and LDA microbe topic matrices  $\varphi^M$ , which represent the microbe's weight to each  
456 topic, were generated.

457  
458 The correlation network between different microbes was calculated using Pearson correlation. The cutoff to  
459 define a co-abundance edge was 0.8 for  $R(\varphi_{,m}^M, \varphi_{,m}^M)$  and 0.3 for  $R(\varphi_{,m}^M, \varphi_{,m}^M)$ . The microbe network modules, which  
460 were densely connected themselves but sparsely connected to other modules, were clustered based on  
461 between-ness [35] and the other algorithms; we also tested label propagation and fast greedy algorithms [36].  
462

463  
464 We also compared the LDA topics with the microbes in the same clusters. If a microbe was the top 10 most  
465 highly contributed for a topic, then we labeled the topic number in the bracket. Some microbes may have  
466 multiple topic labels because they highly contribute to multiple topics.

#### 467 **DATA ACCESS**

468 Sputum bulk-cell RNAseq data can be found under the bioproject SRRXXXXX and sputum single-cell RNAseq  
469 data at SRRYYYYYY.

#### 470 **ACKNOWLEDGMENTS**

471 This work was supported by a National Library of Medicine fellowship to DS (5T15LM007056-28) and an  
472 NHLBI grant to GC (1R01HL118346-01). The authors would like to thank the support of the Yale High  
473 Performance Computing services (Grace, Ruddle, Farnam) and Yale Center for Genome Analysis.  
474

#### 475 **DISCLOSURE DECLARATION**

476 The authors declare no conflicts of interest. [[[check with GC]]]  
477

#### 478 **ABBREVIATIONS**

479 LDA: Latent Dirichlet Allocation; PCA: Principle Component Analysis;  
480

481 **FIGURES:**

482 **Figure 1. RNAseq alignment summary for control and asthmatic sputum, showing fractions of reads**  
483 **that aligned to different biotypes. Alignments to the protein-coding biotype were used to generate the**  
484 **gene expression matrix (G), which was then deconvolved into a cell fraction matrix (F) and cell**  
485 **expression (E). The exogenous reads were used to generate a microbial profile matrix (M). These**  
486 **matrices were then related to the clinical phenotype matrix (P) for biological insight.**  
487

488 Figure 2. Deconvolution of RNAseq human reads into cell fractions using cell signature deconvolution. A)  
489 Schematic showing the imputation of a cell fraction matrix and cell-specific expression matrix. B) Imputed cell  
490 fractions were validated using microscopy; Cell fractions were then correlated with SARP cluster for two major  
491 cell type: (C) Macrophages.M0 and (D) Mast cell activated. E) the cell fraction of LM22 gene signature  
492 deconvolution are correlated with the topic distribution of samples from LDA analysis. F) G) tSNE analysis  
493 and clustering using single cell RNAseq from Asthmatic patient and control. H) The fraction of single  
494 cells for different cell types clusters between Asthmatic patient and Controls.  
495

496 Figure 3. Exogenous RNAseq analysis. (A). The correlations between microbes abundance and cell fraction  
497 based on LM22 signature (B) The correlation between microbes abundance and clinical information. (C) The  
498 microbes abundance shows clear patterns that associated with Asthmatic severity. (D) The co-abundance  
499 network and overlay with the associated topics of microbes.  
500

501 Figure 4. Prediction of cross-talk between microbe and gene. (A) The diagram to combine linear and LDA-  
502 based non-linear algorithms to identify gene microbe linkages. (B) simple correlation to identify strong linkages  
503 between microbes and genes. Gene set over represent analysis for genes. X-axis is the  $-\log(p\text{-value})$ . (C) the  
504 importance of features (LDA topics for gene and microbes) in the RandomForest model by Gini index. The top  
505 20 associated gene in topics 8 (D) and topic 7 (E) of genes, and topic 1 (F) of microbes.  
506

507 Figure 5. The linkage between microbes and genes reflects the heterogeneity of different cell types. (A).  
508 Linkages between microbes and genes. (B) The linkages indicated by the cell proportion of certain types.  
509

510 **SUPPLEMENTAL INFORMATION**

511 **Figure S1:**

512 The distribution of cell fraction of sample in different group.

513 **Figure S2**

514 The heatmap between NMF component and cell fraction from LM22.



515 **Figure S3**

516 Overall view of correlation of all the extracellular organism with clinical features.

517 **Figure S4**

518 Heatmap of the correlation of topics (gene and microbe ) with clinical information.

519 **Figure S5**

520 Co-abundance network based on correlation of abundance.\

521

522 **Figure S6**

523

524 Top associated microbes in microbe topics

525

526 **Figure S7**

527

528 Top associated genes in gene topics

529

530 **Figure S8**

531

532 (A) The topic distribution of patient. (B) The gene enrichment analysis of top genes in topic 4.

533

534 **Figure S9**

535 Main pathways get involved by microbe linked genes.

536

537 **REFERENCES**

- 538 1. Yan X, Chu JH, Gomez J, Koenigs M, Holm C, He X, et al. Noninvasive analysis of the sputum  
539 transcriptome discriminates clinical phenotypes of asthma. *Am J Respir Crit Care Med*. 2015;191(10):1116-25.  
540 Epub 2015/03/13. doi: 10.1164/rccm.201408-1440OC. PubMed PMID: 25763605; PubMed Central PMCID:  
541 PMC4451618.
- 542 2. Huang YJ, Nariya S, Harris JM, Lynch SV, Choy DF, Arron JR, et al. The airway microbiome in patients  
543 with severe asthma: Associations with disease features and severity. *J Allergy Clin Immunol*. 2015;136(4):874-  
544 84. Epub 2015/07/30. doi: 10.1016/j.jaci.2015.05.044. PubMed PMID: 26220531; PubMed Central PMCID:  
545 PMC4600429.
- 546 3. Gibson PG, Girgis-Gabardo A, Morris MM, Mattoli S, Kay JM, Dolovich J, et al. Cellular characteristics  
547 of sputum from patients with asthma and chronic bronchitis. *Thorax*. 1989;44(9):693-9. Epub 1989/09/01. doi:  
548 10.1136/thx.44.9.693. PubMed PMID: 2588203; PubMed Central PMCID: PMC462047.
- 549 4. Belda J, Leigh R, Parameswaran K, O'Byrne PM, Sears MR, Hargreave FE. Induced sputum cell  
550 counts in healthy adults. *Am J Respir Crit Care Med*. 2000;161(2 Pt 1):475-8. Epub 2000/02/15. doi:  
551 10.1164/ajrccm.161.2.9903097. PubMed PMID: 10673188.
- 552 5. Newman AM, Liu CL, Green MR, Gentles AJ, Feng W, Xu Y, et al. Robust enumeration of cell subsets  
553 from tissue expression profiles. *Nat Methods*. 2015;12(5):453-7. Epub 2015/03/31. doi: 10.1038/nmeth.3337.  
554 PubMed PMID: 25822800; PubMed Central PMCID: PMC4739640.
- 555 6. Consortium EP. An integrated encyclopedia of DNA elements in the human genome. *Nature*.  
556 2012;489(7414):57-74. Epub 2012/09/08. doi: 10.1038/nature11247. PubMed PMID: 22955616; PubMed  
557 Central PMCID: PMC3439153.

- 558 7. Rozowsky J, Kitchen RR, Park JJ, Galeev TR, Diao J, Warrell J, et al. exceRpt: A Comprehensive  
559 Analytic Platform for Extracellular RNA Profiling. *Cell Syst.* 2019;8(4):352-7 e3. Epub 2019/04/09. doi:  
560 10.1016/j.cels.2019.03.004. PubMed PMID: 30956140.
- 561 8. Welling SH, Clemmensen LK, Buckley ST, Hovgaard L, Brockhoff PB, Refsgaard HH. In silico  
562 modelling of permeation enhancement potency in Caco-2 monolayers based on molecular descriptors and  
563 random forest. *Eur J Pharm Biopharm.* 2015;94:152-9. Epub 2015/05/26. doi: 10.1016/j.ejpb.2015.05.012.  
564 PubMed PMID: 26004819.
- 565 9. Welling SH, Refsgaard HH, Brockhoff PB, Clemmensen LH. Forest Floor Visualizations of Random  
566 Forests. arXiv e-prints [Internet]. 2016 May 01, 2016. Available from:  
567 <https://ui.adsabs.harvard.edu/abs/2016arXiv160509196W>.
- 568 10. Payne BA, Chinnery PF. Mitochondrial dysfunction in aging: Much progress but many unresolved  
569 questions. *Biochim Biophys Acta.* 2015;1847(11):1347-53. Epub 2015/06/09. doi:  
570 10.1016/j.bbabi.2015.05.022. PubMed PMID: 26050973; PubMed Central PMCID: PMC4580208.
- 571 11. Turnbaugh PJ, Ley RE, Hamady M, Fraser-Liggett CM, Knight R, Gordon JI. The human microbiome  
572 project. *Nature.* 2007;449(7164):804-10. Epub 2007/10/19. doi: 10.1038/nature06244. PubMed PMID:  
573 17943116; PubMed Central PMCID: PMC3709439.
- 574 12. Essilfie AT, Simpson JL, Horvat JC, Preston JA, Dunkley ML, Foster PS, et al. Haemophilus influenzae  
575 infection drives IL-17-mediated neutrophilic allergic airways disease. *PLoS Pathog.* 2011;7(10):e1002244.  
576 Epub 2011/10/15. doi: 10.1371/journal.ppat.1002244. PubMed PMID: 21998577; PubMed Central PMCID:  
577 PMC3188527.
- 578 13. Bousquet J, Chanez P, Lacoste JY, Barneon G, Ghavanian N, Enander I, et al. Eosinophilic  
579 inflammation in asthma. *N Engl J Med.* 1990;323(15):1033-9. Epub 1990/10/11. doi:  
580 10.1056/NEJM199010113231505. PubMed PMID: 2215562.
- 581 14. Ahren IL, Eriksson E, Egesten A, Riesbeck K. Nontypeable Haemophilus influenzae activates human  
582 eosinophils through beta-glucan receptors. *Am J Respir Cell Mol Biol.* 2003;29(5):598-605. Epub 2003/04/12.  
583 doi: 10.1165/rcmb.2002-0138OC. PubMed PMID: 12689921.
- 584 15. Galli SJ, Tsai M. Mast cells in allergy and infection: versatile effector and regulatory cells in innate and  
585 adaptive immunity. *Eur J Immunol.* 2010;40(7):1843-51. Epub 2010/06/29. doi: 10.1002/eji.201040559.  
586 PubMed PMID: 20583030; PubMed Central PMCID: PMC3581154.
- 587 16. Masur H, Rosen PP, Armstrong D. Pulmonary disease caused by Candida species. *Am J Med.*  
588 1977;63(6):914-25. Epub 1977/12/01. PubMed PMID: 343588.
- 589 17. Mathieu E, Escribano-Vazquez U, Descamps D, Cherbuy C, Langella P, Riffault S, et al. Paradigms of  
590 Lung Microbiota Functions in Health and Disease, Particularly, in Asthma. *Front Physiol.* 2018;9:1168. Epub  
591 2018/09/25. doi: 10.3389/fphys.2018.01168. PubMed PMID: 30246806; PubMed Central PMCID:  
592 PMC6110890.
- 593 18. Ascencio F, Ljungh A, Wadstrom T. Characterization of lactoferrin binding by Aeromonas hydrophila.  
594 *Appl Environ Microbiol.* 1992;58(1):42-7. Epub 1992/01/01. PubMed PMID: 1311545; PubMed Central PMCID:  
595 PMC195170.
- 596 19. Sajjan U, Keshavjee S, Forstner J. Responses of well-differentiated airway epithelial cell cultures from  
597 healthy donors and patients with cystic fibrosis to Burkholderia cenocepacia infection. *Infect Immun.*  
598 2004;72(7):4188-99. Epub 2004/06/24. doi: 10.1128/IAI.72.7.4188-4199.2004. PubMed PMID: 15213163;  
599 PubMed Central PMCID: PMC427436.
- 600 20. Park CY, Heo JN, Suk K, Lee WH. Sodium azide suppresses LPS-induced expression MCP-1 through  
601 regulating IkappaBzeta and STAT1 activities in macrophages. *Cell Immunol.* 2017;315:64-70. Epub  
602 2017/04/11. doi: 10.1016/j.cellimm.2017.02.007. PubMed PMID: 28391993.
- 603 21. Hildebrand D, Bode KA, Riess D, Cerny D, Waldhuber A, Rommler F, et al. Granzyme A produces  
604 bioactive IL-1beta through a nonapoptotic inflammasome-independent pathway. *Cell Rep.* 2014;9(3):910-7.  
605 Epub 2014/12/02. doi: 10.1016/j.celrep.2014.10.003. PubMed PMID: 25437548.
- 606 22. Chapman SJ, Khor CC, Vannberg FO, Rautanen A, Segal S, Moore CE, et al. NFKBIZ polymorphisms  
607 and susceptibility to pneumococcal disease in European and African populations. *Genes Immun.*  
608 2010;11(4):319-25. Epub 2009/10/03. doi: 10.1038/gene.2009.76. PubMed PMID: 19798075; PubMed Central  
609 PMCID: PMC3051152.

- 610 23. Baldwin AS, Jr. The NF-kappa B and I kappa B proteins: new discoveries and insights. *Annu Rev*  
611 *Immunol.* 1996;14:649-83. Epub 1996/01/01. doi: 10.1146/annurev.immunol.14.1.649. PubMed PMID:  
612 8717528.
- 613 24. Motoyama M, Yamazaki S, Eto-Kimura A, Takeshige K, Muta T. Positive and negative regulation of  
614 nuclear factor-kappaB-mediated transcription by IkappaB-zeta, an inducible nuclear protein. *J Biol Chem.*  
615 2005;280(9):7444-51. Epub 2004/12/25. doi: 10.1074/jbc.M412738200. PubMed PMID: 15618216.
- 616 25. Yamazaki S, Muta T, Matsuo S, Takeshige K. Stimulus-specific induction of a novel nuclear factor-  
617 kappaB regulator, IkappaB-zeta, via Toll/Interleukin-1 receptor is mediated by mRNA stabilization. *J Biol*  
618 *Chem.* 2005;280(2):1678-87. Epub 2004/11/04. doi: 10.1074/jbc.M409983200. PubMed PMID: 15522867.
- 619 26. Round JL, Mazmanian SK. The gut microbiota shapes intestinal immune responses during health and  
620 disease. *Nat Rev Immunol.* 2009;9(5):313-23. Epub 2009/04/04. doi: 10.1038/nri2515. PubMed PMID:  
621 19343057; PubMed Central PMCID: PMC4095778.
- 622 27. Shreiner AB, Kao JY, Young VB. The gut microbiome in health and in disease. *Curr Opin*  
623 *Gastroenterol.* 2015;31(1):69-75. Epub 2014/11/14. doi: 10.1097/MOG.000000000000139. PubMed PMID:  
624 25394236; PubMed Central PMCID: PMC4290017.
- 625 28. Erb-Downward JR, Thompson DL, Han MK, Freeman CM, McCloskey L, Schmidt LA, et al. Analysis of  
626 the lung microbiome in the "healthy" smoker and in COPD. *PLoS One.* 2011;6(2):e16384. Epub 2011/03/03.  
627 doi: 10.1371/journal.pone.0016384. PubMed PMID: 21364979; PubMed Central PMCID: PMC3043049.
- 628 29. Morris A, Beck JM, Schloss PD, Campbell TB, Crothers K, Curtis JL, et al. Comparison of the  
629 respiratory microbiome in healthy nonsmokers and smokers. *Am J Respir Crit Care Med.* 2013;187(10):1067-  
630 75. Epub 2013/03/16. doi: 10.1164/rccm.201210-1913OC. PubMed PMID: 23491408; PubMed Central PMCID:  
631 PMC3734620.
- 632 30. Hilty M, Burke C, Pedro H, Cardenas P, Bush A, Bossley C, et al. Disordered microbial communities in  
633 asthmatic airways. *PLoS One.* 2010;5(1):e8578. Epub 2010/01/07. doi: 10.1371/journal.pone.0008578.  
634 PubMed PMID: 20052417; PubMed Central PMCID: PMC2798952.
- 635 31. Dobin A, Davis CA, Schlesinger F, Drenkow J, Zaleski C, Jha S, et al. STAR: ultrafast universal RNA-  
636 seq aligner. *Bioinformatics.* 2013;29(1):15-21. Epub 2012/10/30. doi: 10.1093/bioinformatics/bts635. PubMed  
637 PMID: 23104886; PubMed Central PMCID: PMC3530905.
- 638 32. Cole JR, Wang Q, Fish JA, Chai B, McGarrell DM, Sun Y, et al. Ribosomal Database Project: data and  
639 tools for high throughput rRNA analysis. *Nucleic Acids Res.* 2014;42(Database issue):D633-42. Epub  
640 2013/11/30. doi: 10.1093/nar/gkt1244. PubMed PMID: 24288368; PubMed Central PMCID:  
641 PMC3965039.
- 642 33. Wood DE, Salzberg SL. Kraken: ultrafast metagenomic sequence classification using exact alignments.  
643 *Genome Biol.* 2014;15(3):R46. Epub 2014/03/04. doi: 10.1186/gb-2014-15-3-r46. PubMed PMID: 24580807;  
644 PubMed Central PMCID: PMC4053813.
- 645 34. Guo M, Wang H, Potter SS, Whitsett JA, Xu Y. SINCERA: A Pipeline for Single-Cell RNA-Seq Profiling  
646 Analysis. *PLoS Comput Biol.* 2015;11(11):e1004575. Epub 2015/11/26. doi: 10.1371/journal.pcbi.1004575.  
647 PubMed PMID: 26600239; PubMed Central PMCID: PMC4658017.
- 648 35. Newman MEJ, Girvan M. Finding and evaluating community structure in networks. *Phys Rev E.*  
649 2004;69(2). PubMed PMID: WOS:000220255500019.
- 650 36. Clauset A, Newman MEJ, Moore C. Finding community structure in very large networks. *Phys Rev E.*  
651 2004;70(6). PubMed PMID: WOS:000226299200018.
- 652

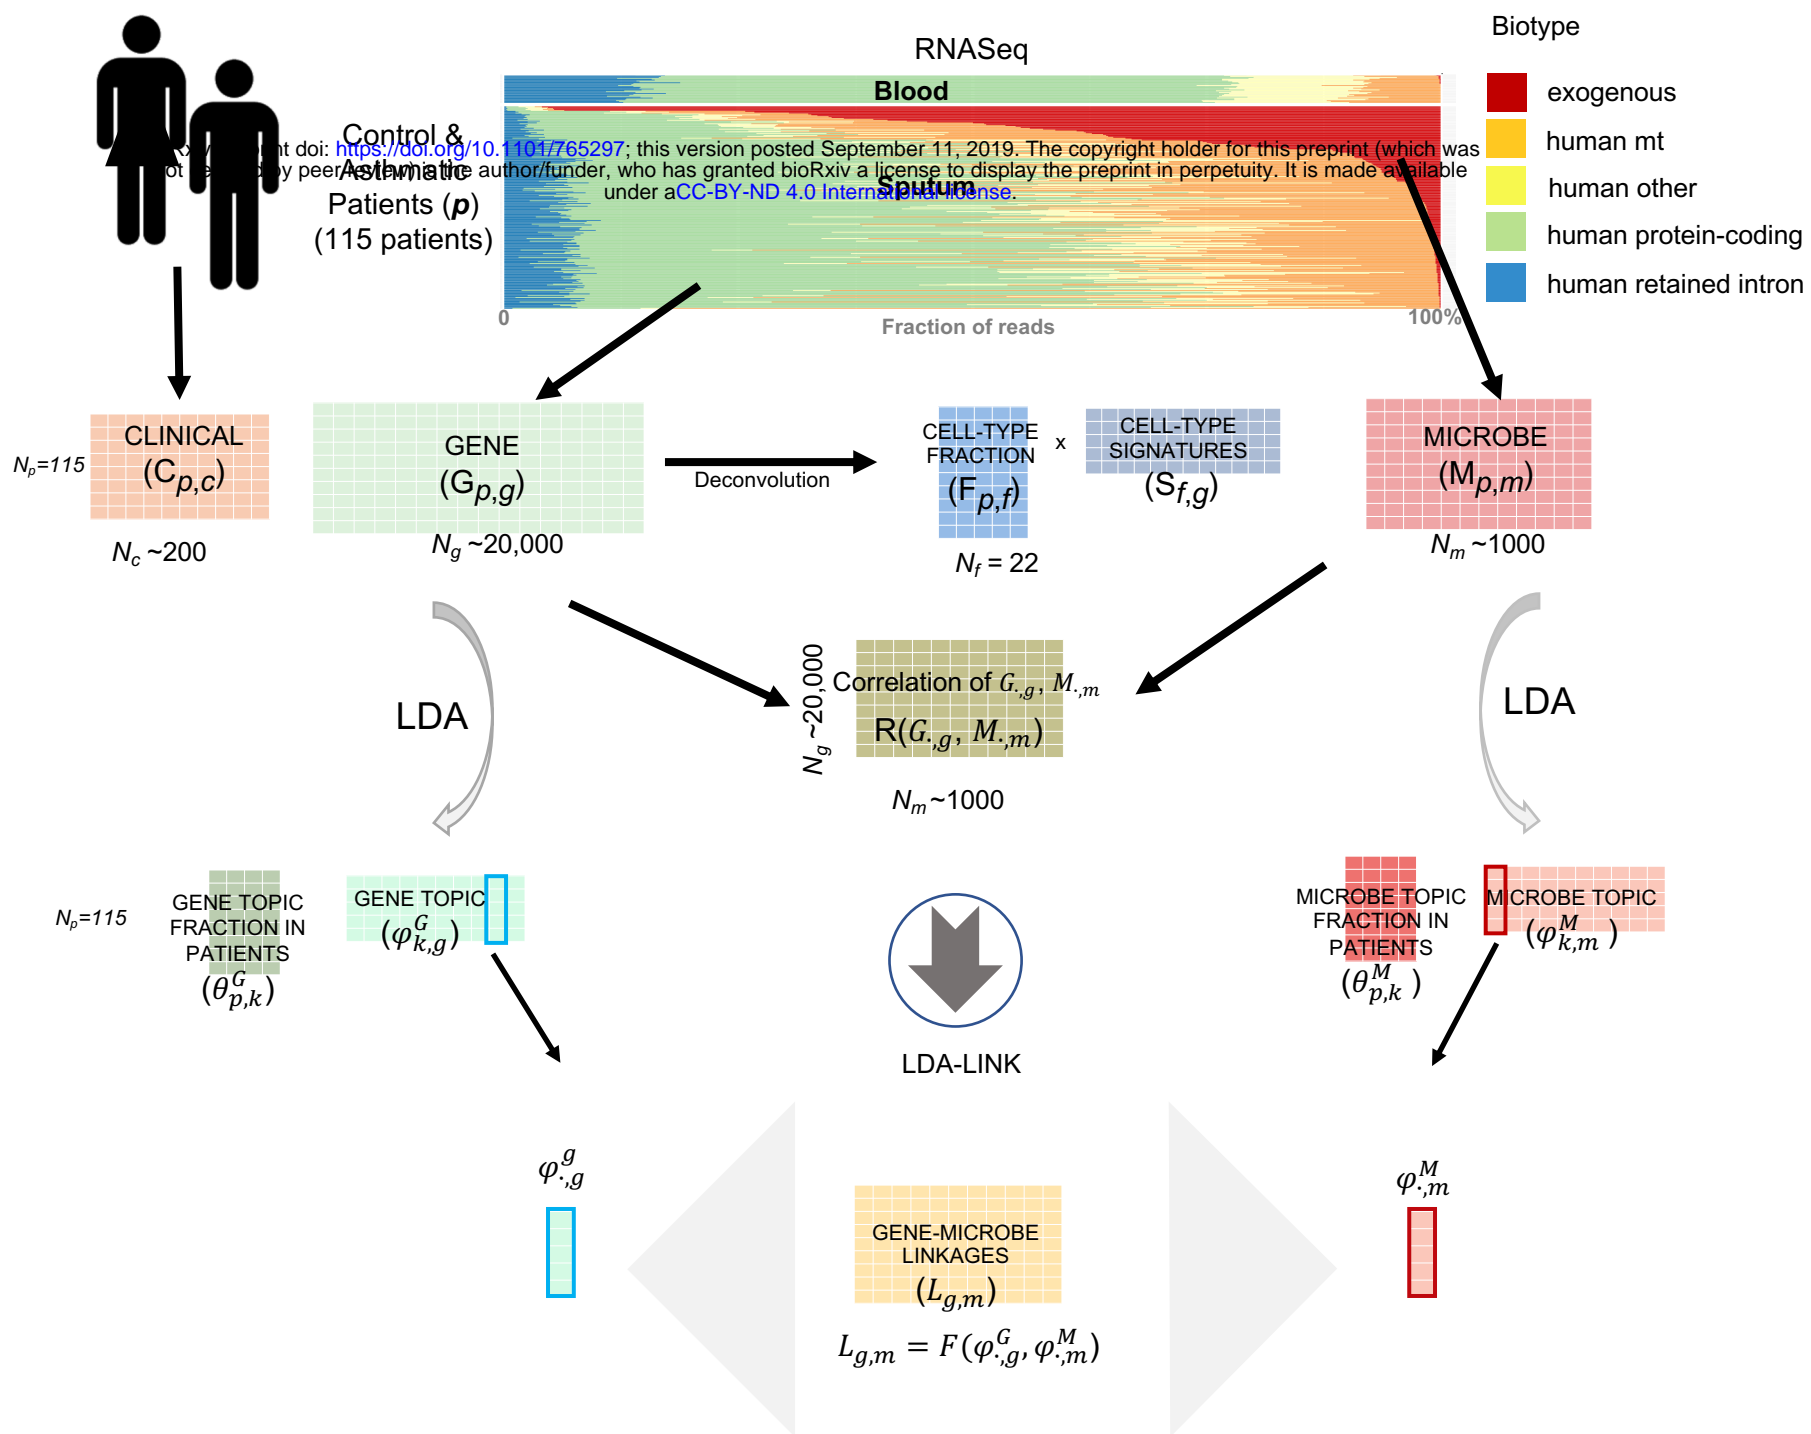

Figure 1

### A. Schema

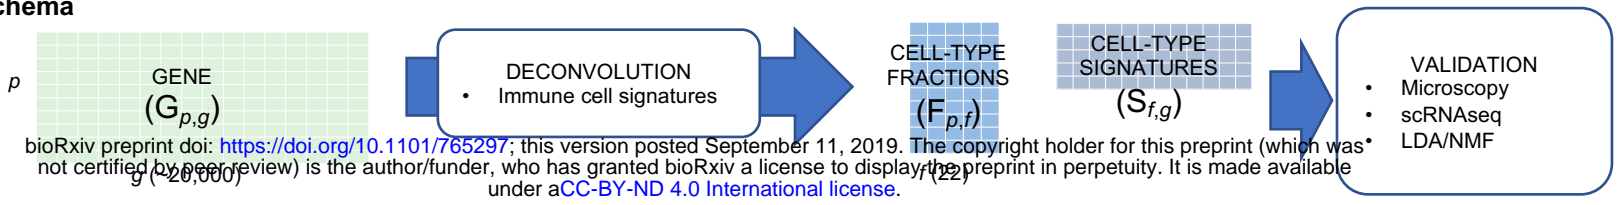

### B Single cell RNAseq of sputum to identify cell types

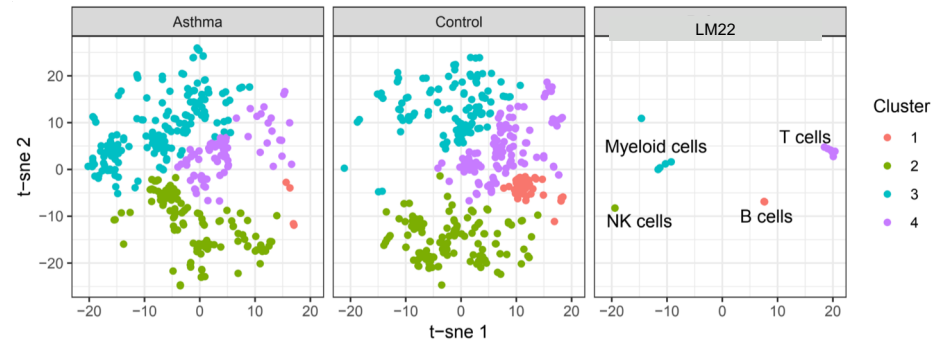

### C. Differences between scRNAseq cell types in Asthmatics and controls

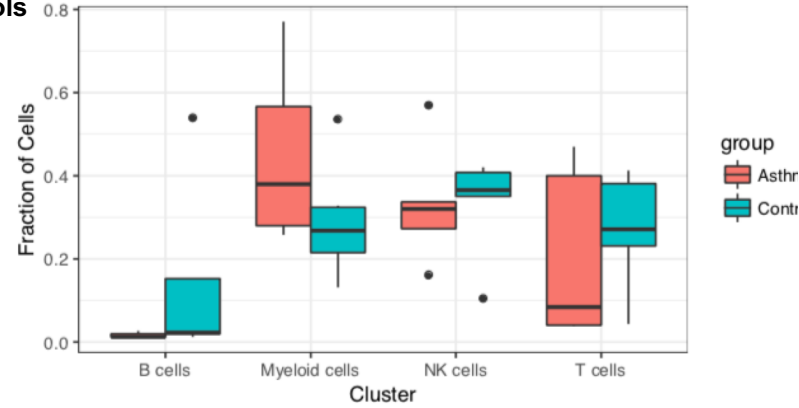

### D

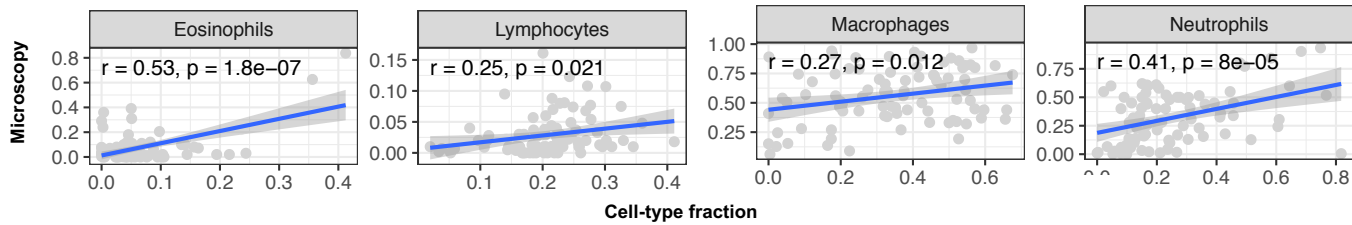

### E. cell type hematopoiesis vs topic (components)

$$R \left( \begin{matrix} \text{CELL-TYPE} \\ \text{FRACTION} \\ (F_{\cdot,f}) \end{matrix}, \begin{matrix} \text{GENE TOPIC} \\ \text{COMPONENTS} \\ (\theta_{\cdot,t}^G) \end{matrix} \right)$$

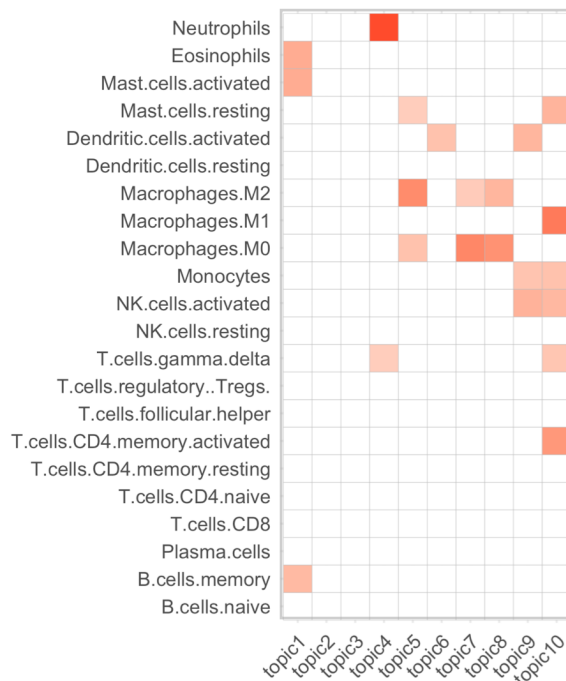

### F

$$R \left( \begin{matrix} \text{CELL-TYPE} \\ \text{FRACTION} \\ (F_{\cdot,f}) \end{matrix}, \begin{matrix} \text{CLINICAL} \\ (C_{\cdot,c}) \end{matrix} \right)$$

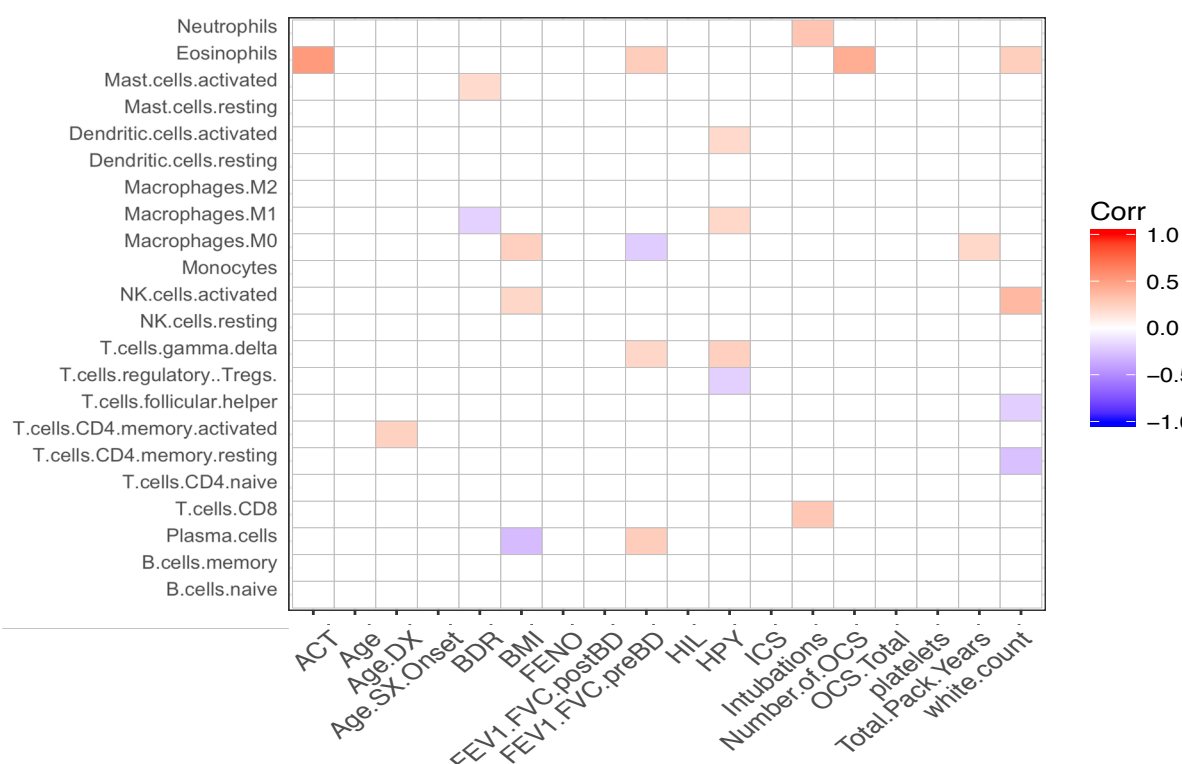

Figure 2



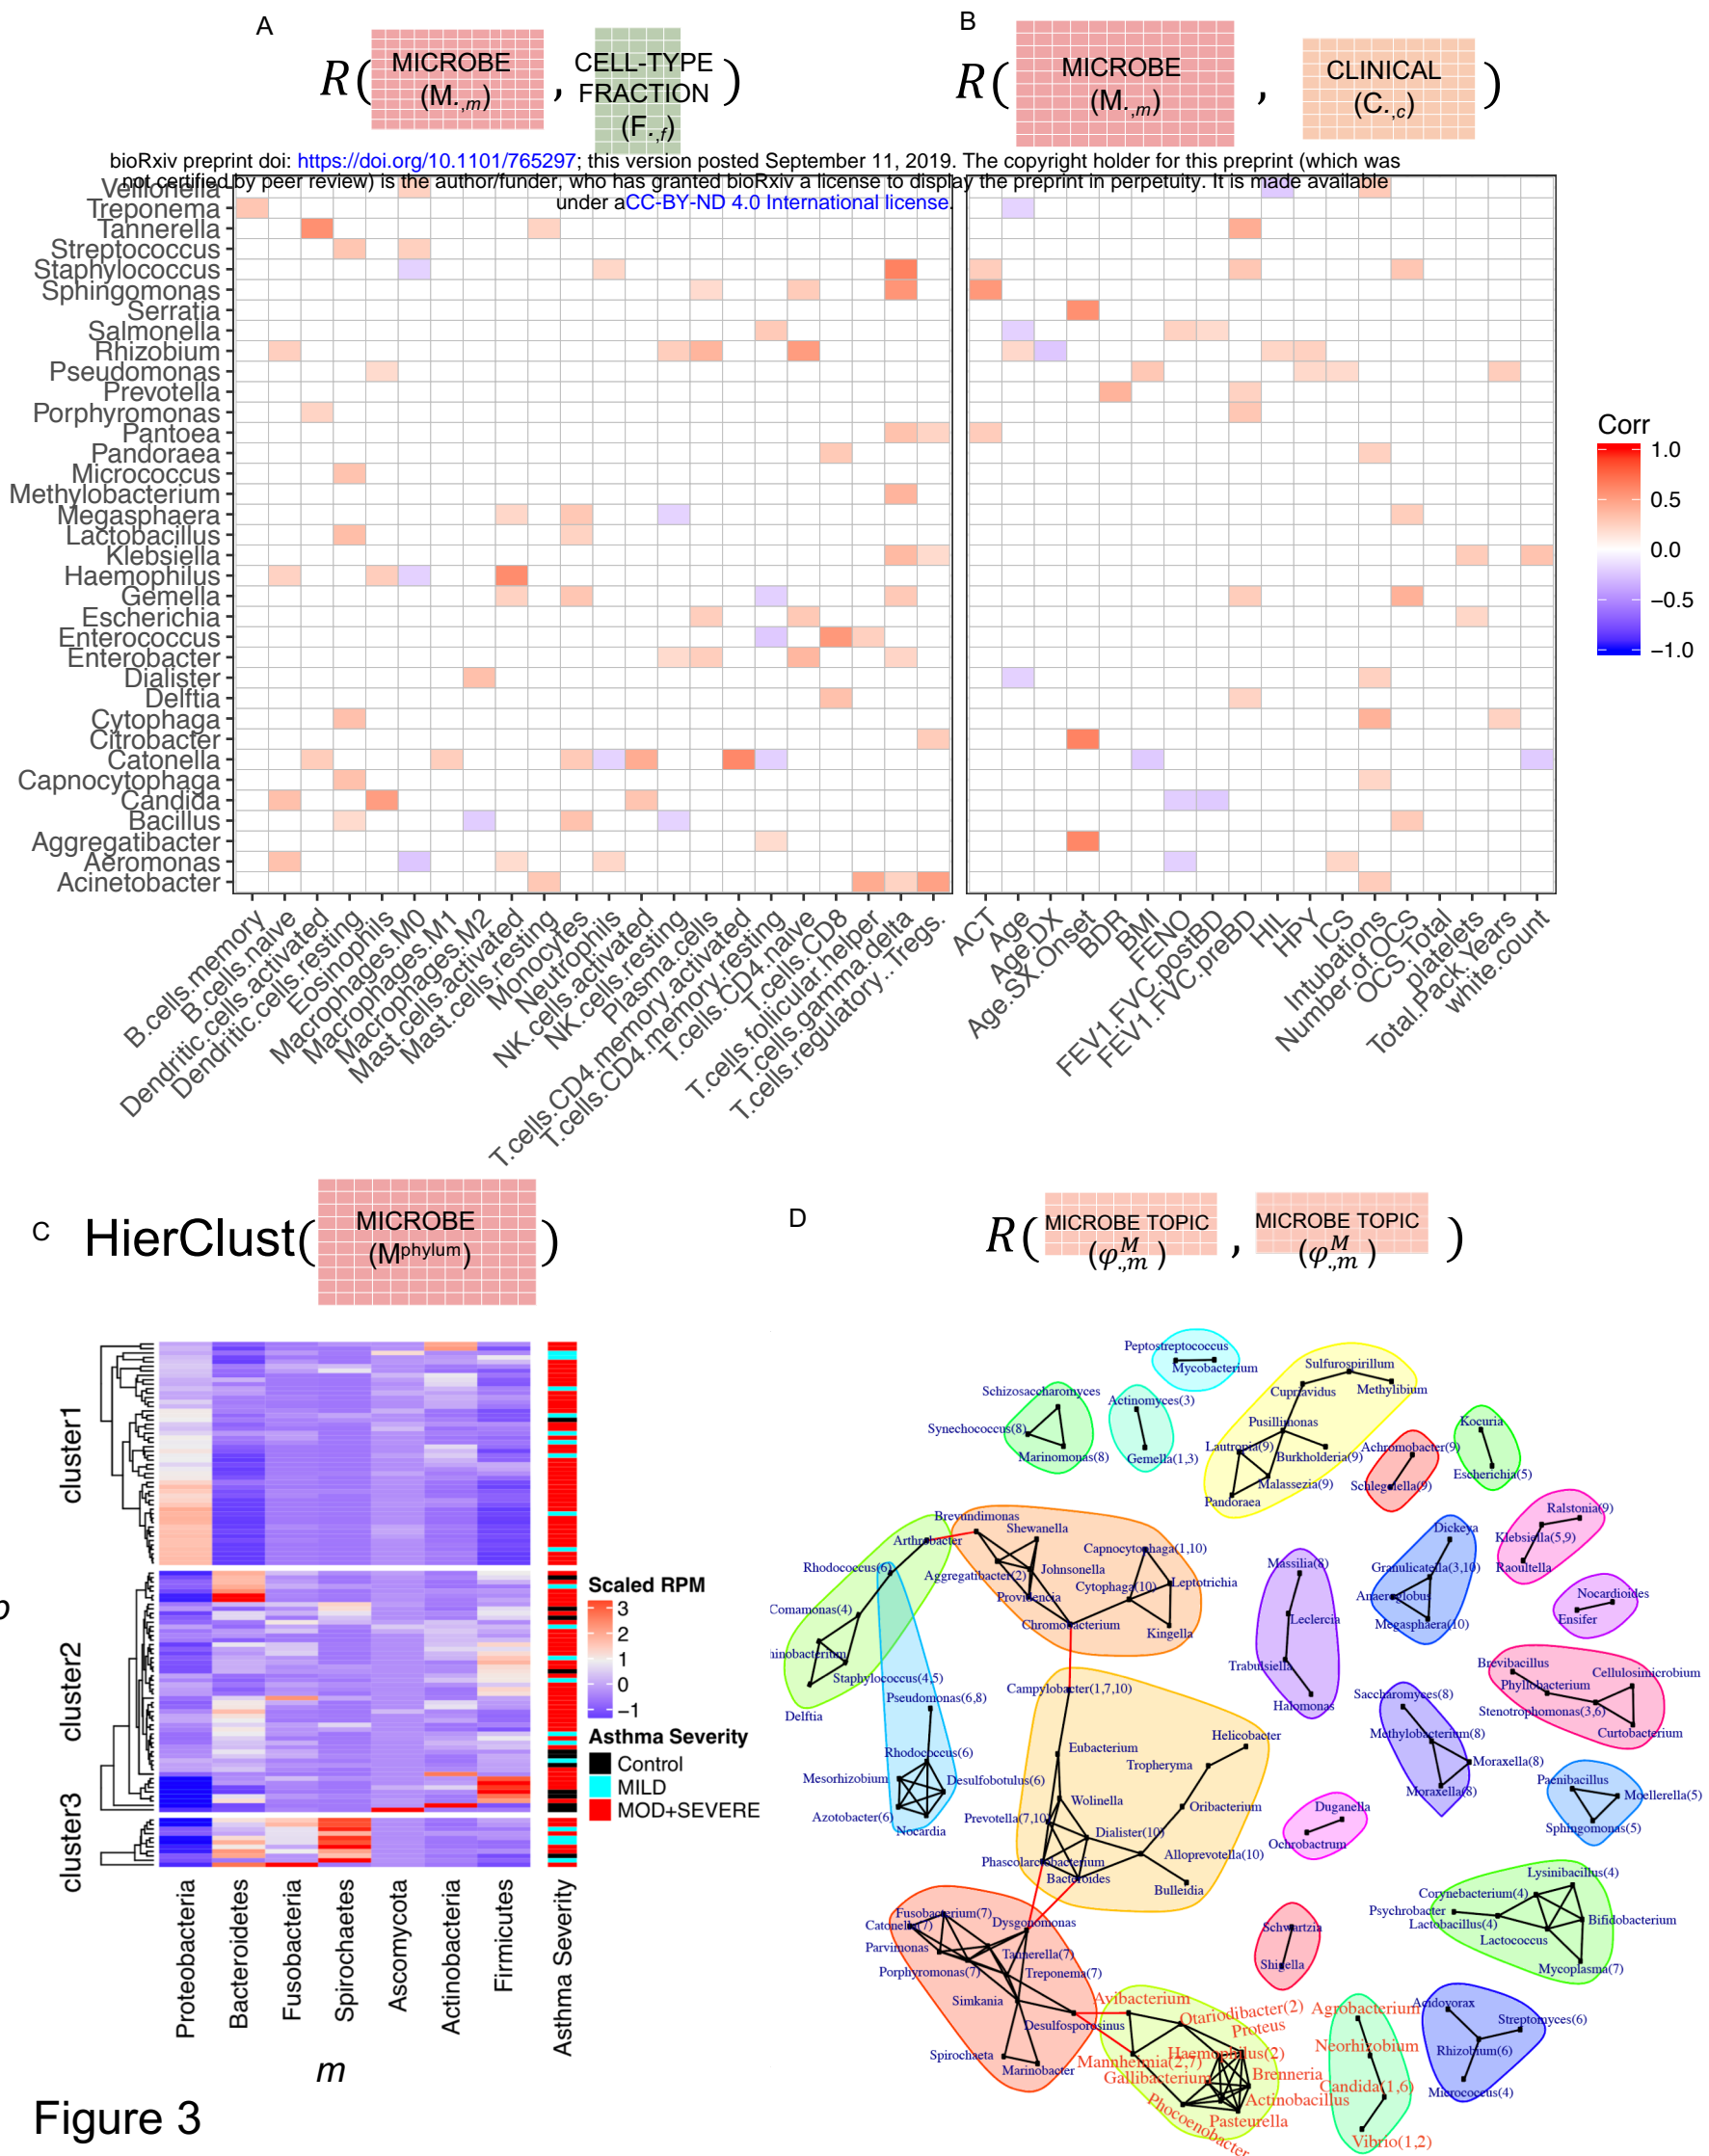

Figure 3

# A Microbe-gene linkage

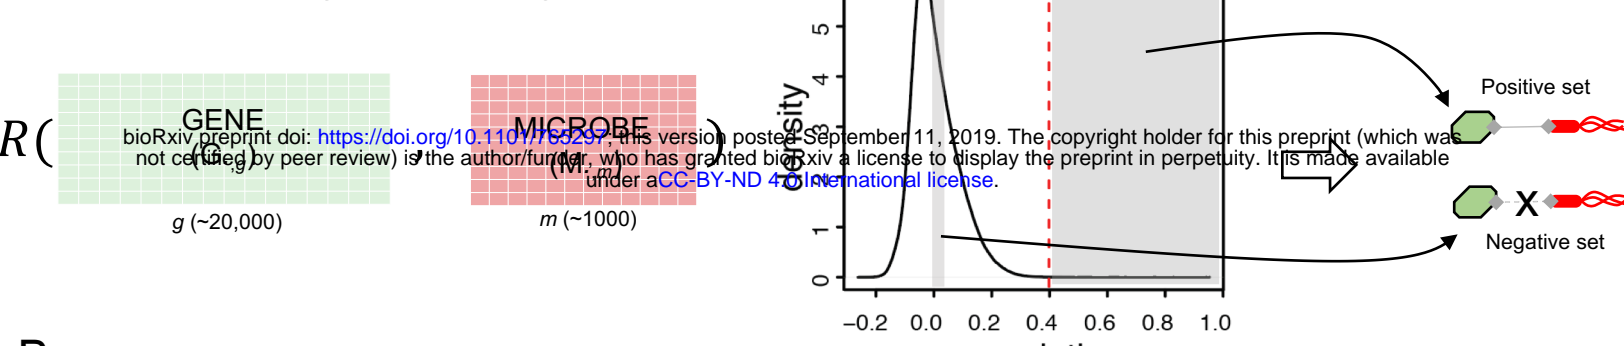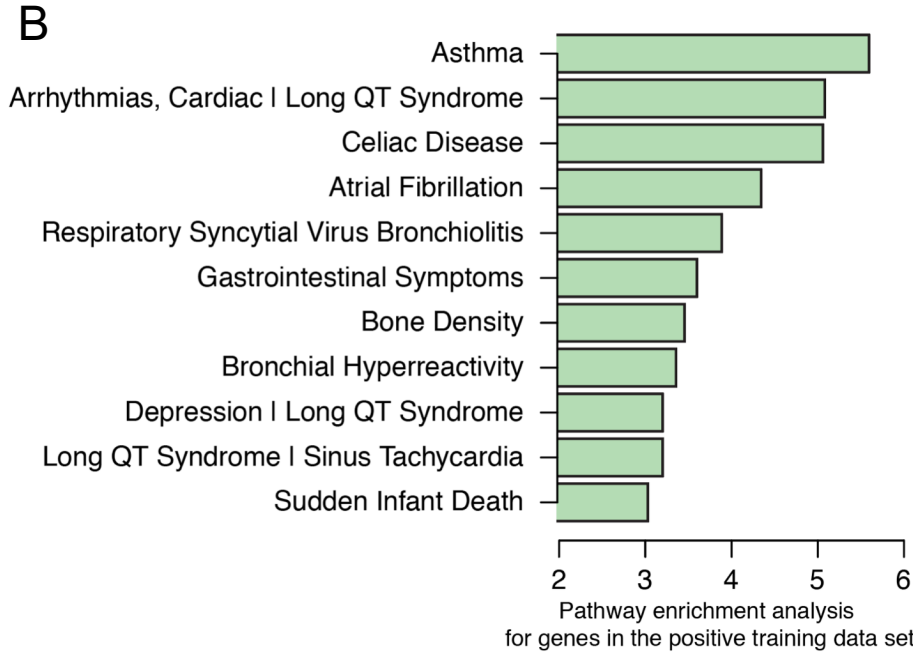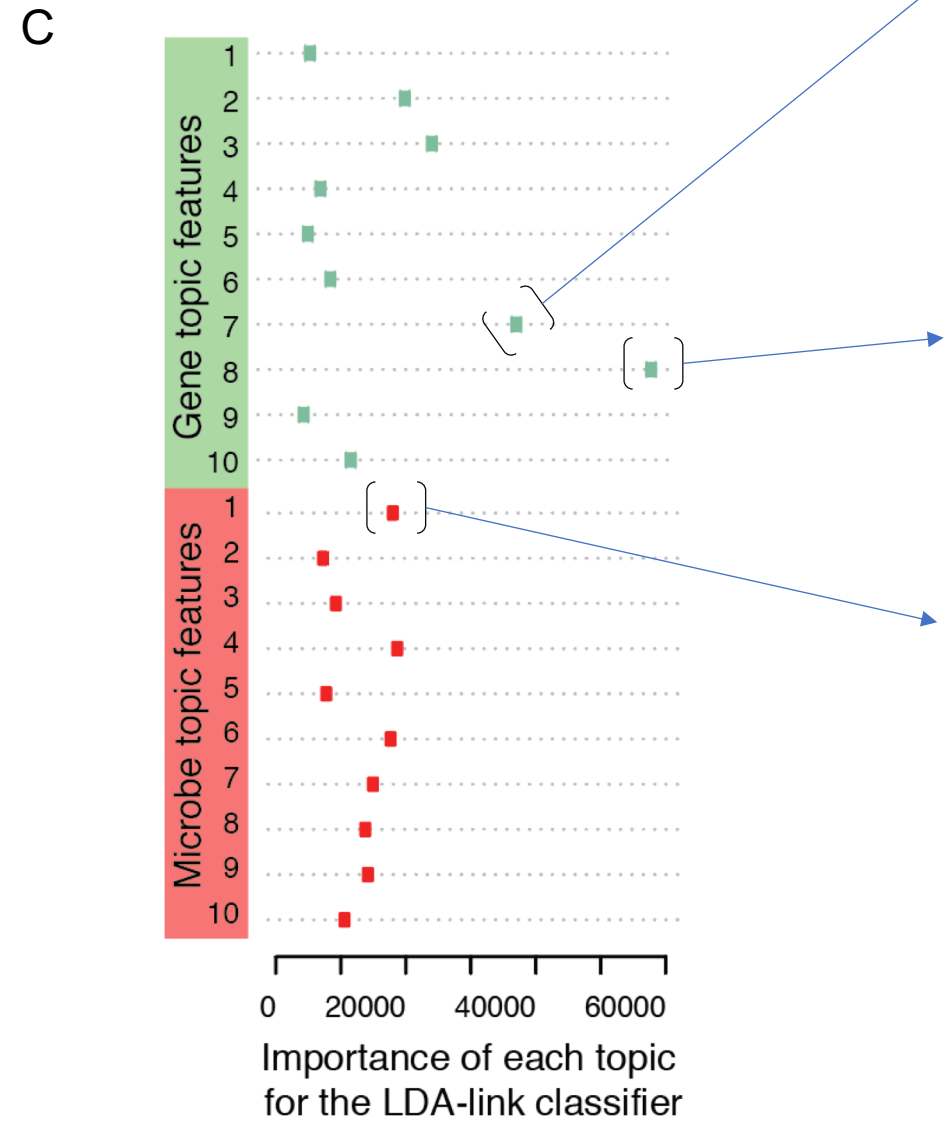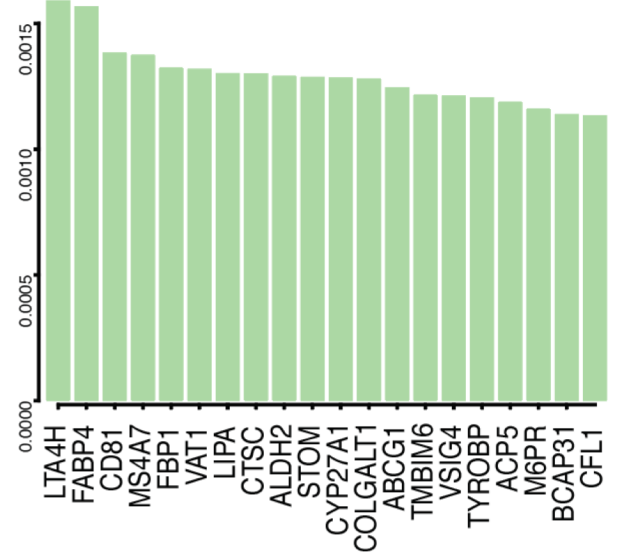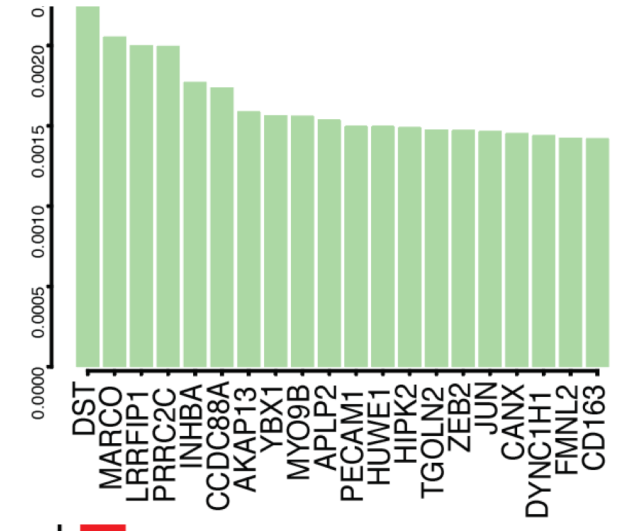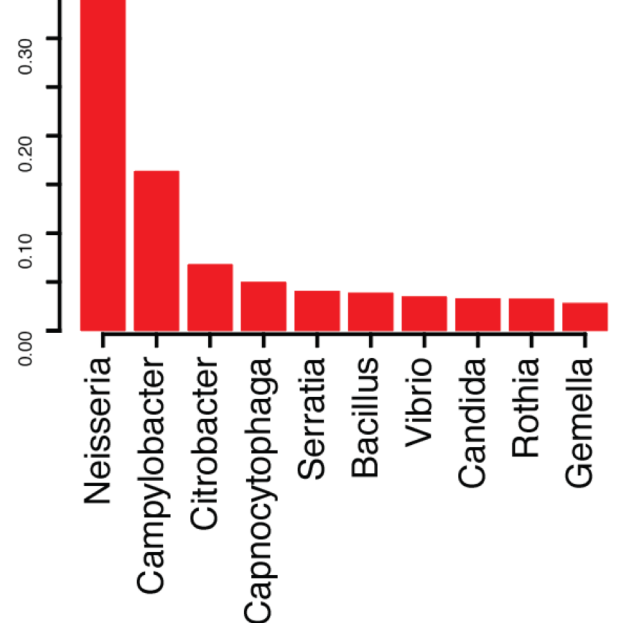

Figure 4

**A** Subset of the gene-microbe linkages defined by the LDA-link model

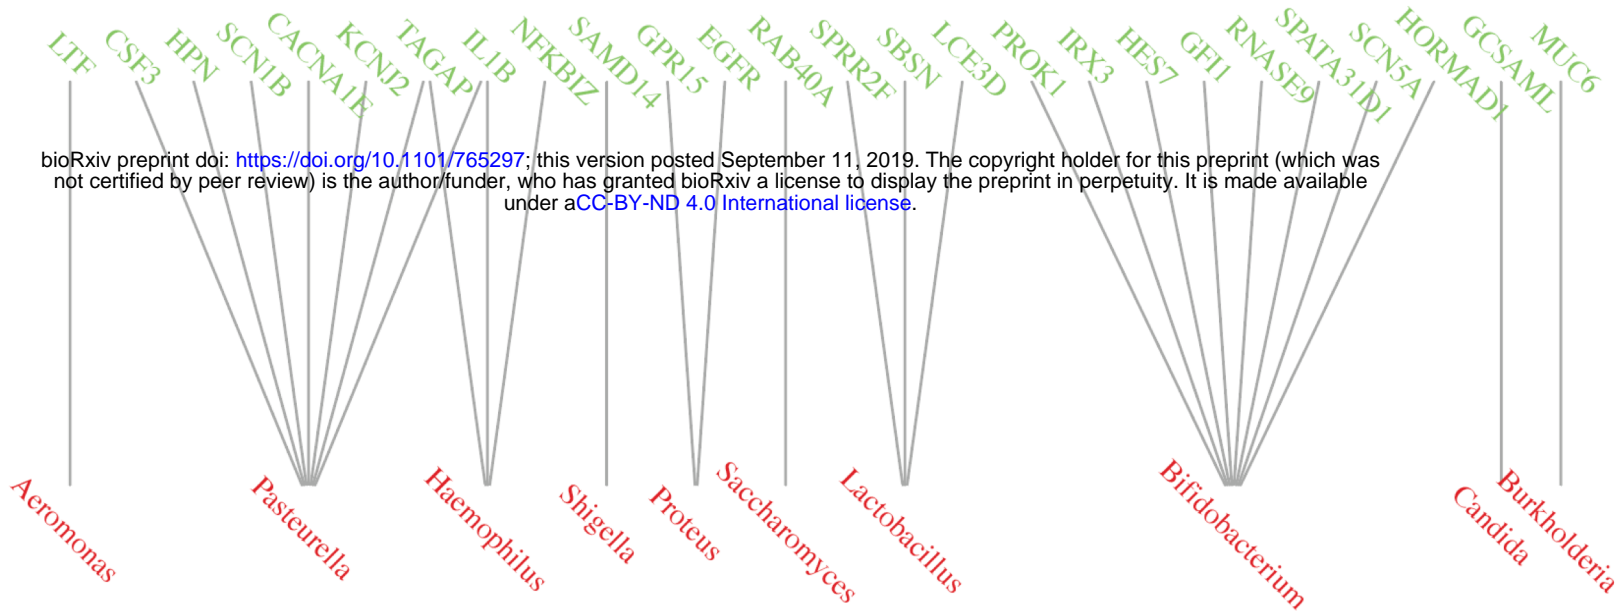

bioRxiv preprint doi: <https://doi.org/10.1101/765297>; this version posted September 11, 2019. The copyright holder for this preprint (which was not certified by peer review) is the author/funder, who has granted bioRxiv a license to display the preprint in perpetuity. It is made available under aCC-BY-ND 4.0 International license.

**B**

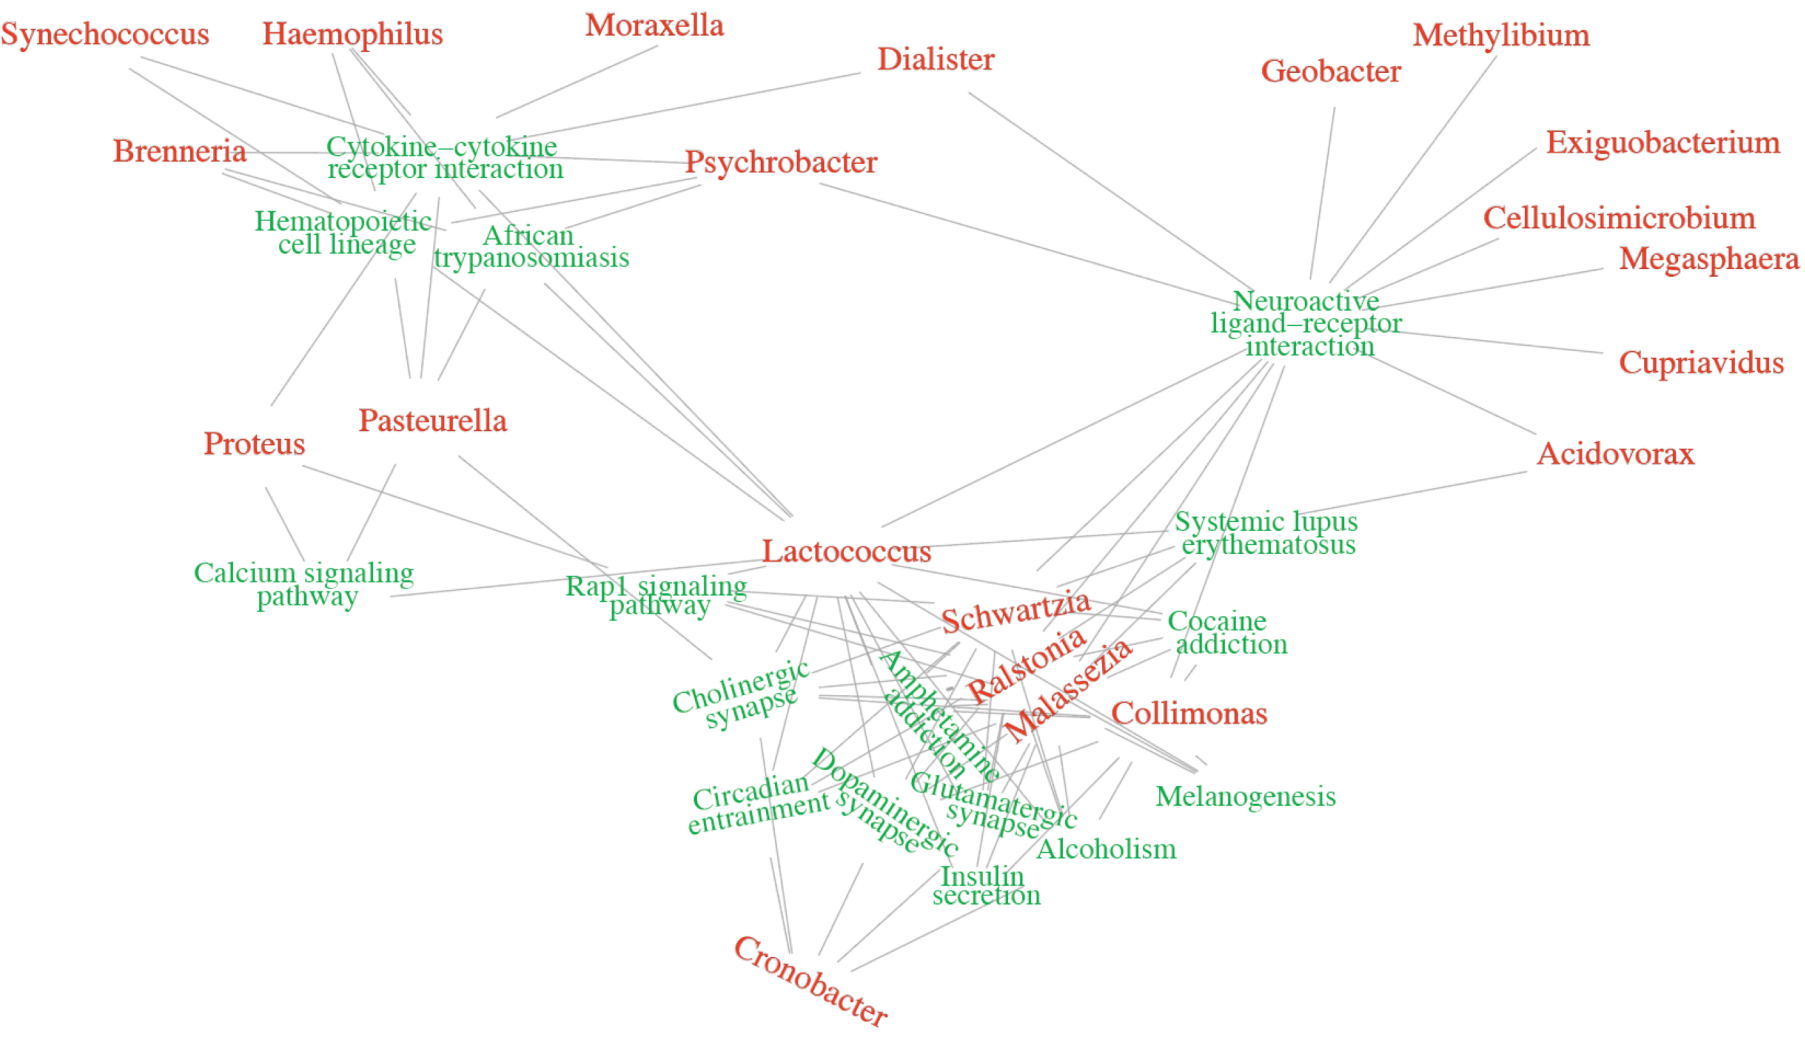

**C**

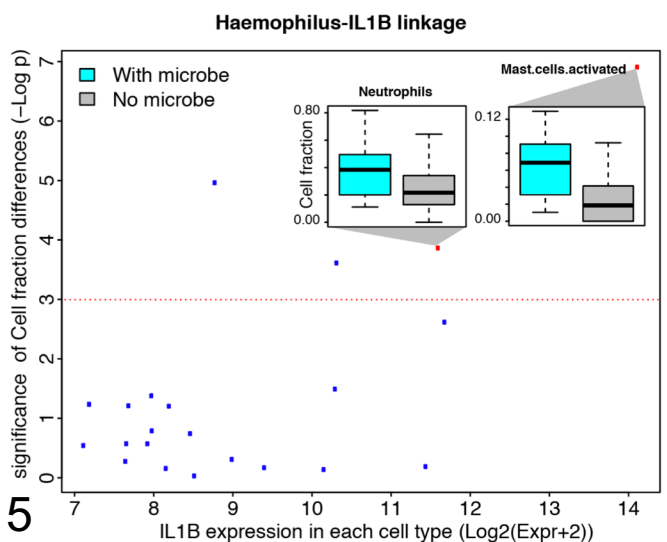

**D**

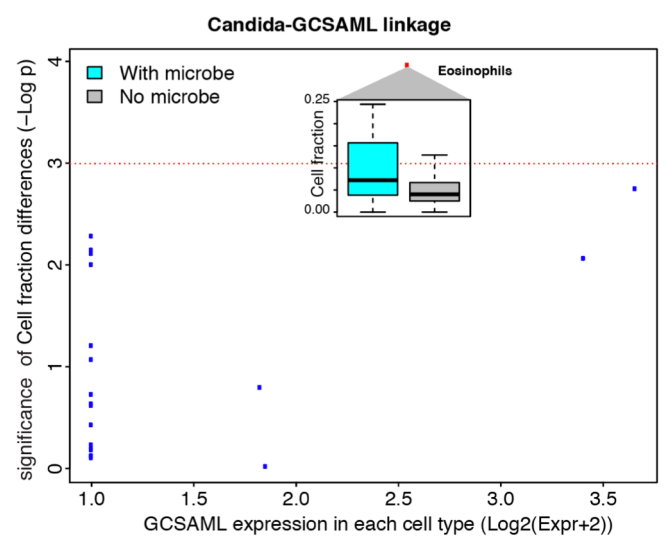

**Figure 5**
